# Supplementary material for: Efficacy of practising Tai Chi for older people with mild dementia: protocol for a randomised controlled study
Source: PubMed Central journal article supplement — BMJ Open. 2018 May 14;8(5):e019940. doi: 10.1136/bmjopen-2017-019940 (PMC5961586; doi:10.1136/bmjopen-2017-019940), 2018-05-14
Supplement: bmjopen-2017-019940.draft_revisions.pdf [file bmjopen-2017-019940.draft_revisions.pdf]

# BMJ Open

BMJ Open is committed to open peer review. As part of this commitment we make the peer review history of every article we publish publicly available.

When an article is published we post the peer reviewers' comments and the authors' responses online. We also post the versions of the paper that were used during peer review. These are the versions that the peer review comments apply to.

The versions of the paper that follow are the versions that were submitted during the peer review process. They are not the versions of record or the final published versions. They should not be cited or distributed as the published version of this manuscript.

BMJ Open is an open access journal and the full, final, typeset and author-corrected version of record of the manuscript is available on our site with no access controls, subscription charges or pay-per-view fees (<http://bmjopen.bmj.com>).

If you have any questions on BMJ Open's open peer review process please email [info.bmjopen@bmj.com](mailto:info.bmjopen@bmj.com)

# BMJ Open

## Effect of Mind-body Exercise (Tai Chi) for Patients with Early Dementia: Protocol for a Randomized Controlled Study

|                               |                                                                                                                                                                                                                                                                                                                                                                                                                                                                                                                                                                                                                                                             |
|-------------------------------|-------------------------------------------------------------------------------------------------------------------------------------------------------------------------------------------------------------------------------------------------------------------------------------------------------------------------------------------------------------------------------------------------------------------------------------------------------------------------------------------------------------------------------------------------------------------------------------------------------------------------------------------------------------|
| Journal:                      | <i>BMJ Open</i>                                                                                                                                                                                                                                                                                                                                                                                                                                                                                                                                                                                                                                             |
| Manuscript ID                 | bmjopen-2017-019940                                                                                                                                                                                                                                                                                                                                                                                                                                                                                                                                                                                                                                         |
| Article Type:                 | Protocol                                                                                                                                                                                                                                                                                                                                                                                                                                                                                                                                                                                                                                                    |
| Date Submitted by the Author: | 05-Oct-2017                                                                                                                                                                                                                                                                                                                                                                                                                                                                                                                                                                                                                                                 |
| Complete List of Authors:     | Lyu, Jihui; Beijing Geriatric Hospital, Center for Cognitive Disorders; Beijing Institute for Brain Disorders, Alzheimer's disease Center<br>Li, Wenjie; Beijing Geriatric Hospital, Center for Cognitive Disorders<br>Rong, Xiangjiang; Capital University of Physical Education and Sport<br>Wei, Lian ; Capital University of Physical Education and Sport<br>Chen, Xueli; Beijing Geriatric Hospital, Department of Rehabilitation<br>Huang, Yanna; Beijing Institute for Brain Disorders<br>Li, Mo; Beijing Geriatric Hospital, Center for Cognitive Disorders<br>Li, Fangling; Beijing Geriatric Hospital, Department of Traditional Chinese Medicine |
| Keywords:                     | Dementia < NEUROLOGY, Tai Chi, cognitive function                                                                                                                                                                                                                                                                                                                                                                                                                                                                                                                                                                                                           |
|                               |                                                                                                                                                                                                                                                                                                                                                                                                                                                                                                                                                                                                                                                             |

SCHOLARONE™  
Manuscripts

1  
2  
3 **Effect of Mind-body Exercise (Tai Chi) for Patients with Early**  
4  
5  
6 **Dementia: Protocol for a Randomized Controlled Study**  
7

8  
9 Jihui Lyu<sup>1,2†\*</sup>, Wenjie Li<sup>1†</sup>, Xiangjiang Rong<sup>3†</sup>, Lian Wei<sup>4</sup>, Xueli Chen<sup>5</sup>,  
10  
11 Yanna Huang<sup>1,2†</sup>, Mo Li<sup>1</sup>, Fengling Li<sup>6</sup>  
12

13  
14 <sup>1</sup>Center for Cognitive Disorders, Beijing Geriatric Hospital, Beijing 100095, China  
15

16 <sup>2</sup>Alzheimer's disease Center, Beijing Institute for Brain Disorders, Capital Medical  
17  
18 University, Beijing 100069, China  
19

20  
21 <sup>3</sup>School of Kinesiology and Health, Capital University of Physical Education and Sport,  
22  
23 Beijing 100191, China  
24

25  
26 <sup>4</sup>Graduate School, Capital University of Physical Education and Sport, Beijing 100191,  
27  
28 China  
29

30  
31 <sup>5</sup>Department of Rehabilitation, Beijing Geriatric Hospital, Beijing 100095, China  
32

33  
34 <sup>6</sup>Department of Traditional Chinese Medicine, Beijing Geriatric Hospital, Beijing  
35  
36 100095, China  
37

38  
39 <sup>†</sup> These authors contributed equally to this work.

40  
41 **Correspondence to:** Dr Jihui Lyu, Email: [lvjihui@139.com](mailto:lvjihui@139.com)  
42

43  
44 **Key words:** dementia, Tai Chi, cognitive function  
45

46  
47 **Word count:** 1942  
48  
49  
50  
51  
52  
53  
54  
55  
56  
57  
58  
59  
60

## ABSTRACT

### Introduction

At present, there is no cure for most types of dementia. Many studies suggest that Tai Chi exercise is a safe and appropriate mind-body exercise for old people and efficiently slows down age-related cognitive decline. This trial is undertaken to create a set of Tai Chi exercise specially designed for people with cognitive impairments by a multidisciplinary team. We will also evaluate its effects on cognitive function, behavior/mood, fall risk and activities of daily living of patients with early dementia.

### Methods and analysis

A set of Tai Chi program named "Cognition Protecting Tai Chi" (CPT) was developed by a research team comprised of geriatricians, neurologists, rehabilitation specialists, sports medicine experts, and Chinese medicine experts. Then a randomized controlled study will be conducted. Ninety patients with early dementia will be recruited and randomly divided into intervention group and control group. The intervention group will take this CPT three times a week for 20 minutes under guidance of the professional therapist. The control group will receive routine treatments. The study will last for 10 months. All participants will undergo a battery of neuropsychological and functional evaluations, including Mini-Mental State Examination, Montreal Cognitive Assessment, The World Health

1  
2  
3 Organization—University of California Los Angeles Auditory Verbal  
4  
5 Learning test, Geriatric Depression Scale, Neuropsychological Inventory,  
6  
7 Barthel Index, at baseline, 5 and 10 months. Fall incidence will also be  
8  
9 recorded. Primary outcomes are changes of above psychometric  
10  
11 assessments of the participants, and secondary outcome is fall incidence.  
12  
13

14  
15 **Ethics and dissemination** This study was approved by the ethical review  
16  
17 committee of the Beijing Geriatric Hospital (protocol number: 2015-021).  
18  
19 Informed consents will be got from all participants or their guardians.  
20  
21 Findings of this study will be published in peer-reviewed journals,  
22  
23 academic conferences, and other healthcare settings where appropriate.  
24  
25

#### 26 27 28 **Trial registration number**

29  
30 ChiCTR-INR-16009872 (<http://www.chictr.org.cn>)  
31  
32

#### 33 34 35 **Strengths and limitations of this study**

36  
37 ► This is the first study to create a Tai Chi program which is specifically  
38  
39 designed for patients with cognitive impairments by a multidisciplinary  
40  
41 professional team.  
42  
43

44  
45 ► We also design a randomized controlled trial to evaluate its effects.  
46  
47 This will add evidence to nonpharmacological therapy for dementia.  
48  
49

50  
51 ► An open-label study design may result in bias though is difficult to  
52  
53 make the Tai Chi intervention blind.  
54  
55

## INTRODUCTION

Demented patients can show various clinical symptoms, with memory loss as the most common initial problem. Later on, complaints of inattention, miscalculation, unreasoning and disorientation become more and more evident<sup>1</sup>. Besides cognitive disorders, mental and behavioral disturbances, such as depression, anxiety and aggressiveness may happen. As disease going on, these syndromes progressively interfere with vital activities of daily living and resulting in independence. At present, there is no cure for most types of dementia. Current pharmacologic interventions that used to rescue cognitive function, such as acetylcholinesterase inhibitors and memantine, have limited efficacy and their adverse effects are not uncommon<sup>2-5</sup>. Meanwhile, typical and atypical antipsychotics for dementia have the same or even severe shortcomings.

According to neuroplasticity theory, the repetition of stimulate-reflect training helps demented patients with preservation and restoration of brain functions, even when their brains have been damaged to some extent<sup>6</sup>. Therefore, there is a considerable focus on investigation of non-pharmacological approach associated with enhancing cognition. Many studies suggest that mind-body exercise efficiently prevent and slow down age-related cognitive decline, and benefit the prognosis of dementia<sup>7-10</sup>.

1  
2  
3  
4            Tai Chi, one of Chinese traditional martial art, is an aerobic  
5  
6            mind-body exercise with mild-to-moderate intensity and is safe for the  
7  
8            elderly. It requires focus of concentration as well as shifting balance of  
9  
10           the body in accordance with soft limb movements. Its gentle and  
11  
12           smooth movements are coupled with steady breathing. In the theory of  
13  
14           traditional Chinese medicine, qi and blood can both be mobilized and  
15  
16           coordinated when practicing Tai Chi, this unique exercise. Excitability of  
17  
18           the central nervous system is also improved while some parts of the  
19  
20           brain areas being in working state and other parts being inhibited. Thus,  
21  
22           most brain neurons can have enough relaxation, including those are  
23  
24           getting atrophy. In this kind of alternate tension with relaxation,  
25  
26           function of cerebral cortex is improved and progress of cognitive decline  
27  
28           may get delayed. As strength and flexibility of the body both increase,  
29  
30           fewer falls happen, as well as other complications.

31  
32  
33            Tai Chi has been recommended as a preferred kind of exercise for  
34  
35            fall prevention in the elderly by the American Geriatrics Society, because  
36  
37            it improves not only muscular strength, co-ordination and balance, but  
38  
39            also is an enjoyable activity with the potential for long-term insisting<sup>11</sup>.  
40  
41            In a randomized trial carried out in non-demented Chinese elders, 40  
42  
43            weeks of Tai Chi exercise was proved to increase brain volume and  
44  
45            improve cognition better than intervention of social interaction<sup>12</sup>.  
46  
47            Evidences have also shown that Tai Chi is an appropriate exercise for  
48  
49  
50  
51  
52  
53  
54  
55  
56  
57  
58  
59  
60

1  
2  
3 individuals with dementia in its early stage, which helps improving  
4 quality of life, brain function and even inducing reconstruction of  
5 neurons. It has the potential to serve as an alternative therapeutic  
6 approach for dementia persons<sup>13-15</sup>. Other studies reported that physical  
7 exercise like Tai Chi improved mood and alleviated psychiatric problems  
8 in early or middle stages of dementia and also significantly reduced  
9 caregiver distresses<sup>16</sup>. Sticky Hands Tai Chi, a special Tai Chi training  
10 technique practiced with a partner, promoted a comfortably intimate  
11 interaction between the two persons and improved exercise adherence  
12 and mood in demented older people<sup>13</sup>.

13  
14  
15  
16  
17  
18  
19  
20  
21  
22  
23  
24  
25  
26  
27  
28  
29  
30  
31  
32  
33  
34  
35  
36  
37  
38  
39  
40  
41  
42  
43  
44  
45  
46  
47  
48  
49  
50  
51  
52  
53  
54  
55  
56  
57  
58  
59  
60  
China mainland is the origin of Tai Chi exercise and it has the  
biggest number of demented older people<sup>17</sup>. However, almost all the  
available evidence was conducted by foreign investigators. Moreover,  
though there have been various programs of Tai Chi exercise, none of  
them is designed for people with cognitive impairments. Our objective is  
to develop an appropriate Tai Chi program specifically for patients with  
mild dementia, which is called "Cognition Protecting Tai Chi" (CPT), and  
to evaluate its protective effects on cognitive function, behavior/mood,  
fall risk and activities of daily living. If results are positive, it will have  
potential to be recommended as a routine cost-effective exercise  
intervention for this population.



## METHODS

**Settings:** This study is conducted at Center for Cognitive Disorders of Beijing Geriatrics Hospital (BGH). This hospital is a tertiary hospital with 900 inpatient beds located in Haidian District of Beijing City. The Center for Cognitive Disorders of BGH is a department serving for the elderly with cognitive impairments, which is also the Guidance Center for Cognitive Rehabilitation of the Haidian District.

### Study design

There are two steps in this study design (Figure 1).

Firstly, a Tai Chi exercise program was specifically designed for cognitively impaired patients by a research team comprised of geriatricians, neurologists, rehabilitation specialists, sports medicine experts, and Chinese medicine experts. We deleted those unsafe and complex actions in traditional 8 style Tai Chi programs and added actions which were thought more beneficial to cognitive functions based on theories of traditional Chinese medicine science. This set of Tai Chi exercise was named "Cognition Protecting Tai Chi" (CPT). It has mainly 8 styles of actions, and each action can be divided into three motions. Then, CPT was performed in 5 patients with mild dementia who were invited to do the pre-experiment for 4 weeks. We modified those Tai Chi actions further where necessary according to their compliance and feedback till the final version was done.

1  
2  
3  
4  
5  
6  
7  
8  
9  
10  
11  
12  
13  
14  
15  
16  
17  
18  
19  
20  
21  
22  
23  
24  
25  
26  
27  
28  
29  
30  
31  
32  
33  
34  
35  
36  
37  
38  
39  
40  
41  
42  
43  
44  
45  
46  
47  
48  
49  
50  
51  
52  
53  
54  
55  
56  
57  
58  
59  
60

There are mainly 8 styles of actions in the final version of CPT except routine Starting Posture and Closing Form, which includes Raising Both Hands, Forearm Rollings on Both Sides, Brush Knee and Twist Step on Both sides, Grasp the Bird's Tail-Left Side and then Right Side, Cloud Hands, Single Whip, Work at Shuttles on Both Side, and Raising Left and then Right Hands (Figure 2).

Secondly, we will conduct a randomized controlled trial in participants who have mild dementia.

### **Recruitments of participants**

Participants will be recruited from long-term care facilities near Beijing Geriatric Hospital, including Wenquan senior apartment, Lengquan senior apartment, and Hexihui senior apartment. Residents who meet the inclusion criteria will be recruited and written consent forms will be signed by all participants or their guardians.

### **Inclusion criteria**

Patients aged no less than 60 years and in early stage of dementia (diagnosis based on The Diagnostic and Statistical Manual of Mental Disorders, 4th edition) with a Clinical Dementia Rating score of less than 2 are enrolled in this study.

### **Exclusion criteria**

Patients who have severe visual and auditory impairments, serious physical disease in important organs (such as heart, lung, kidney, liver

1  
2  
3 and so on), movement disorders, and are unable to accept assessments  
4  
5 or interventions which are required in this study for any reasons.  
6  
7

### 8 **Randomization**

9  
10 Participants enrolled will be randomly divided into intervention group or  
11  
12 control group at a ratio of 1:1. A computer-generated list will be used to  
13  
14 do the randomization by a study assist who has no idea of the  
15  
16 subsequent allotment.  
17  
18

### 19 **Intervention**

20  
21 The intervention group will perform Tai Chi exercise three times a week  
22  
23 for 20 minutes under the guidance of the professional therapists. The  
24  
25 control group will receive routine treatments. The study will last for 10  
26  
27 months.  
28  
29

### 30 **Assessment**

31  
32 The Chinese version of Mini Mental State Examination (MMSE)<sup>18</sup> is a  
33  
34 30-point questionnaire that is used to measure cognitive impairment. It  
35  
36 examines functions of attention and calculation, recall, language, ability  
37  
38 to follow simple commands and orientation.  
39  
40

41  
42 The Montreal Cognitive Assessment (MoCA) Beijing version  
43  
44 (www.mocatest.org) is another 30-point test for assessing cognitive  
45  
46 function. It includes items of short-term memory recall, visuospatial  
47  
48 abilities, multiple aspects of executive functions, attention,  
49  
50 concentration and working memory, language and orientation to time  
51  
52  
53  
54  
55  
56  
57  
58  
59  
60

1  
2  
3 and place. More difficult and multiple tasks make it more sensitive to  
4  
5  
6 mild cognitive changes than MMSE.  
7

8 The World Health Organization–University of California Los Angeles  
9  
10 Auditory Verbal Learning test (WHO-UCLA-AVL)<sup>19</sup> is a tool to assess  
11  
12 immediate recall and delayed recall with 15 words independent in  
13  
14 meaning. Immediate recall is performed by asking subject to remember  
15  
16 and recall those 15 words just after each auditory learning, and this  
17  
18 learning-recall process is repeated for three times. An average  
19  
20 performance is recorded. Delayed recall is performed by asking subject  
21  
22 to recall those 15 words in 30-45 minutes after the immediate recall  
23  
24 being done.  
25  
26  
27  
28

29  
30 The Geriatric Depression Scale (GDS)<sup>20</sup> is a 30-item self-report  
31  
32 assessment used to identify depression in the elderly, of which questions  
33  
34 are answered "yes" or "no." It is simple enough to be used when testing  
35  
36 older individuals with mild or moderate cognitive impairment.  
37  
38

39  
40 The Neuropsychiatric Inventory (NPI)<sup>21</sup> assesses common psychiatric and  
41  
42 behavioral symptoms in dementia. Its items include hallucinations,  
43  
44 delusions, agitation/aggression, dysphoria/depression, anxiety,  
45  
46 irritability, disinhibition, euphoria, apathy, aberrant motor behavior,  
47  
48 sleep and night-time behavior disturbance, appetite and eating disorders.  
49

50  
51 The NPI is administered by the clinician to the caregiver who has detailed  
52  
53 knowledge of the patient's performance. Besides, the caregiver is also  
54  
55  
56  
57  
58  
59

1  
2  
3 asked to rate their own distress associated with daily care of the patient.  
4  
5  
6 The Barthel Index (BI)<sup>22</sup> is an ordinal scale used to measure performance  
7  
8 in activities of daily living (ADL). The ten variables describing ADL and  
9  
10 mobility addressed in the Barthel scale are presence or absence of fecal  
11  
12 incontinence, presence or absence of urinary incontinence, help needed  
13  
14 with grooming, help needed with toilet use, help needed with feeding,  
15  
16 help needed with transfers (e.g. from chair to bed), help needed with  
17  
18 walking, help needed with dressing, help needed with climbing stairs  
19  
20 and help needed with bathing.  
21  
22  
23

24  
25 All participants will undergo above assessments at 0 (baseline), 5  
26  
27 and 10 months. Fall incidence will also be recorded.  
28  
29

### 30 **Outcomes**

31  
32 The primary outcome is score of such psychometric tools and the  
33  
34 secondary outcome is fall incidence.  
35  
36

### 37 **Sample size**

38  
39 The sample size was calculated based on the results of pre-experiment of  
40  
41 this study. Using a type I error of 0.05 and a power of 80%, a sample size  
42  
43 of 40 per groups is enough for both primary outcomes and secondary  
44  
45 outcome. Considering a 10% dropout rate may happen, a total number  
46  
47 of 90 participants will be recruited.  
48  
49  
50

### 51 **Quality control and quality assurance**

52  
53  
54  
55  
56  
57  
58  
59  
60  
61  
62  
63  
64  
65  
66  
67  
68  
69  
70  
71  
72  
73  
74  
75  
76  
77  
78  
79  
80  
81  
82  
83  
84  
85  
86  
87  
88  
89  
90  
91  
92  
93  
94  
95  
96  
97  
98  
99  
100  
101  
102  
103  
104  
105  
106  
107  
108  
109  
110  
111  
112  
113  
114  
115  
116  
117  
118  
119  
120  
121  
122  
123  
124  
125  
126  
127  
128  
129  
130  
131  
132  
133  
134  
135  
136  
137  
138  
139  
140  
141  
142  
143  
144  
145  
146  
147  
148  
149  
150  
151  
152  
153  
154  
155  
156  
157  
158  
159  
160  
161  
162  
163  
164  
165  
166  
167  
168  
169  
170  
171  
172  
173  
174  
175  
176  
177  
178  
179  
180  
181  
182  
183  
184  
185  
186  
187  
188  
189  
190  
191  
192  
193  
194  
195  
196  
197  
198  
199  
200  
201  
202  
203  
204  
205  
206  
207  
208  
209  
210  
211  
212  
213  
214  
215  
216  
217  
218  
219  
220  
221  
222  
223  
224  
225  
226  
227  
228  
229  
230  
231  
232  
233  
234  
235  
236  
237  
238  
239  
240  
241  
242  
243  
244  
245  
246  
247  
248  
249  
250  
251  
252  
253  
254  
255  
256  
257  
258  
259  
260  
261  
262  
263  
264  
265  
266  
267  
268  
269  
270  
271  
272  
273  
274  
275  
276  
277  
278  
279  
280  
281  
282  
283  
284  
285  
286  
287  
288  
289  
290  
291  
292  
293  
294  
295  
296  
297  
298  
299  
300  
301  
302  
303  
304  
305  
306  
307  
308  
309  
310  
311  
312  
313  
314  
315  
316  
317  
318  
319  
320  
321  
322  
323  
324  
325  
326  
327  
328  
329  
330  
331  
332  
333  
334  
335  
336  
337  
338  
339  
340  
341  
342  
343  
344  
345  
346  
347  
348  
349  
350  
351  
352  
353  
354  
355  
356  
357  
358  
359  
360  
361  
362  
363  
364  
365  
366  
367  
368  
369  
370  
371  
372  
373  
374  
375  
376  
377  
378  
379  
380  
381  
382  
383  
384  
385  
386  
387  
388  
389  
390  
391  
392  
393  
394  
395  
396  
397  
398  
399  
400  
401  
402  
403  
404  
405  
406  
407  
408  
409  
410  
411  
412  
413  
414  
415  
416  
417  
418  
419  
420  
421  
422  
423  
424  
425  
426  
427  
428  
429  
430  
431  
432  
433  
434  
435  
436  
437  
438  
439  
440  
441  
442  
443  
444  
445  
446  
447  
448  
449  
450  
451  
452  
453  
454  
455  
456  
457  
458  
459  
460  
461  
462  
463  
464  
465  
466  
467  
468  
469  
470  
471  
472  
473  
474  
475  
476  
477  
478  
479  
480  
481  
482  
483  
484  
485  
486  
487  
488  
489  
490  
491  
492  
493  
494  
495  
496  
497  
498  
499  
500  
501  
502  
503  
504  
505  
506  
507  
508  
509  
510  
511  
512  
513  
514  
515  
516  
517  
518  
519  
520  
521  
522  
523  
524  
525  
526  
527  
528  
529  
530  
531  
532  
533  
534  
535  
536  
537  
538  
539  
540  
541  
542  
543  
544  
545  
546  
547  
548  
549  
550  
551  
552  
553  
554  
555  
556  
557  
558  
559  
560  
561  
562  
563  
564  
565  
566  
567  
568  
569  
570  
571  
572  
573  
574  
575  
576  
577  
578  
579  
580  
581  
582  
583  
584  
585  
586  
587  
588  
589  
590  
591  
592  
593  
594  
595  
596  
597  
598  
599  
600  
601  
602  
603  
604  
605  
606  
607  
608  
609  
610  
611  
612  
613  
614  
615  
616  
617  
618  
619  
620  
621  
622  
623  
624  
625  
626  
627  
628  
629  
630  
631  
632  
633  
634  
635  
636  
637  
638  
639  
640  
641  
642  
643  
644  
645  
646  
647  
648  
649  
650  
651  
652  
653  
654  
655  
656  
657  
658  
659  
660  
661  
662  
663  
664  
665  
666  
667  
668  
669  
670  
671  
672  
673  
674  
675  
676  
677  
678  
679  
680  
681  
682  
683  
684  
685  
686  
687  
688  
689  
690  
691  
692  
693  
694  
695  
696  
697  
698  
699  
700  
701  
702  
703  
704  
705  
706  
707  
708  
709  
710  
711  
712  
713  
714  
715  
716  
717  
718  
719  
720  
721  
722  
723  
724  
725  
726  
727  
728  
729  
730  
731  
732  
733  
734  
735  
736  
737  
738  
739  
740  
741  
742  
743  
744  
745  
746  
747  
748  
749  
750  
751  
752  
753  
754  
755  
756  
757  
758  
759  
760  
761  
762  
763  
764  
765  
766  
767  
768  
769  
770  
771  
772  
773  
774  
775  
776  
777  
778  
779  
780  
781  
782  
783  
784  
785  
786  
787  
788  
789  
790  
791  
792  
793  
794  
795  
796  
797  
798  
799  
800  
801  
802  
803  
804  
805  
806  
807  
808  
809  
810  
811  
812  
813  
814  
815  
816  
817  
818  
819  
820  
821  
822  
823  
824  
825  
826  
827  
828  
829  
830  
831  
832  
833  
834  
835  
836  
837  
838  
839  
840  
841  
842  
843  
844  
845  
846  
847  
848  
849  
850  
851  
852  
853  
854  
855  
856  
857  
858  
859  
860  
861  
862  
863  
864  
865  
866  
867  
868  
869  
870  
871  
872  
873  
874  
875  
876  
877  
878  
879  
880  
881  
882  
883  
884  
885  
886  
887  
888  
889  
890  
891  
892  
893  
894  
895  
896  
897  
898  
899  
900  
901  
902  
903  
904  
905  
906  
907  
908  
909  
910  
911  
912  
913  
914  
915  
916  
917  
918  
919  
920  
921  
922  
923  
924  
925  
926  
927  
928  
929  
930  
931  
932  
933  
934  
935  
936  
937  
938  
939  
940  
941  
942  
943  
944  
945  
946  
947  
948  
949  
950  
951  
952  
953  
954  
955  
956  
957  
958  
959  
960  
961  
962  
963  
964  
965  
966  
967  
968  
969  
970  
971  
972  
973  
974  
975  
976  
977  
978  
979  
980  
981  
982  
983  
984  
985  
986  
987  
988  
989  
990  
991  
992  
993  
994  
995  
996  
997  
998  
999  
1000

1  
2  
3 specialists. All data will be monitored and reviewed by the PI or  
4  
5 co-investigators. Training will be provided to all researchers. Consistency  
6  
7 coefficients in scoring assessment scales between researchers should be  
8  
9 no less than 0.85. Data entry of all the case report forms will be verified  
10  
11 by a second person of the study team.  
12  
13

### 14 15 **Statistical method**

16  
17 All analyses will be performed using SPSS version 16.0. Comparisons of  
18  
19 score variations of psychometric assessments over time between two  
20  
21 groups will be conducted using repeated measurement of variance  
22  
23 analysis. Difference of fall incidences between groups will be analyzed  
24  
25 using Chi-square test.  
26  
27  
28  
29  
30  
31

### 32 33 **CONCLUSION**

34  
35 In this protocol, we describe a “Cognition Protecting Tai Chi” (CPT)  
36  
37 exercise developed by our research team including geriatricians,  
38  
39 neurologists, rehabilitation specialists, sports medicine experts, and  
40  
41 Chinese medicine experts. Moreover, a randomized controlled trial will  
42  
43 be conducted to evaluate the effect of this CPT on patients with  
44  
45 dementia in early stage.  
46  
47  
48

### 49 50 **Contributors**

51  
52 Jihui Lyu conceived the idea and supervised this study and is the  
53  
54 guarantor. Jihui Lyu, Xiangjiang Rong, Xueli Chen, Fangling Li, Wenjie Li  
55  
56  
57  
58  
59  
60

1  
2  
3 and Lian Wei were involved in the design. Wenjie Li, Yanna Huang and  
4  
5 Xiangjiang Rong prepared draft manuscript and Jihui Lyu revised the  
6  
7 manuscript. Wenjie Li, Mo Li and Xiangjiang Rong carried out the  
8  
9 statistical calculation. All authors approved submission of this  
10  
11 manuscript.  
12  
13  
14

### 15 **Funding**

16  
17 This work is supported by Beijing Clinical Characteristics Project of  
18  
19 Beijing Municipal Science and Technology Commission (Project number  
20  
21 Z151100004015023)  
22  
23  
24

### 25 **Competing interests**

26  
27 None declared.  
28  
29

30 **Ethical approval:** This study was approved by the ethical review  
31  
32 committee of the Beijing Geriatric Hospital (Beijing, China).  
33  
34  
35

### 36 **REFERENCES**

- 37  
38  
39  
40 1. Bassil N, Mollaei C. Alzheimer's dementia: a brief review. *J Med Liban*  
41  
42 2012;60(4):192-9  
43  
44  
45 2. Qaseem A, Snow V, Cross JT, Jr., et al. Current pharmacologic  
46  
47 treatment of dementia: a clinical practice guideline from the  
48  
49 American College of Physicians and the American Academy of Family  
50  
51 Physicians. *Ann Intern Med* 2008;148:370-8  
52  
53  
54  
55 3. Schneider LS, Dagerman KS, Insel P. Risk of death with atypical  
56  
57  
58  
59  
60

- 1  
2  
3 antipsychotic drug treatment for dementia: meta-analysis of  
4  
5 randomized placebo-controlled trials. *JAMA* 2005;294:1934-43  
6  
7  
8 4. Schneider LS, Tariot PN, Dagerman KS, et al. Effectiveness of atypical  
9  
10 atypical antipsychotic drugs in patients with Alzheimer's disease. *N Engl J Med*  
11  
12 2006;355:1525-38  
13  
14  
15 5. Schneider LS, Dagerman K, Insel PS. Efficacy and adverse effects of  
16  
17 atypical antipsychotics for dementia: meta-analysis of randomized,  
18  
19 placebo-controlled trials. *Am J Geriatr Psychiatry* 2006;14:191-210  
20  
21  
22  
23 6. Smith GS. Aging and neuroplasticity. *Dialogues Clin Neurosci*  
24  
25 2013;15(1):3-5  
26  
27  
28 7. National Collaborating Centre for Mental Health. Dementia: a  
29  
30 NICE–SCIE guideline on supporting people with dementia and their  
31  
32 carers in health and social care. London: British Psychological Society,  
33  
34 2007  
35  
36  
37  
38 8. Cheng ST, Chow PK, Yu EC, et al. Leisure activities alleviate depressive  
39  
40 symptoms in nursing home residents with very mild or mild dementia.  
41  
42 *Am J Geriatr Psychiatry* 2012;20(10):904-8  
43  
44  
45 9. Knapp M, Thorgrimsen L, Patel A, Cognitive stimulation therapy for  
46  
47 people with dementia: cost-effectiveness analysis. *Br J Psychiatry*  
48  
49 2006;188:574-80  
50  
51  
52  
53 10. Orrell M, Spector A, Thorgrimsen L, Woods B., et al. A pilot study  
54  
55 examining the effectiveness of maintenance Cognitive Stimulation  
56  
57  
58  
59  
60



- 1  
2  
3  
4 Therapy (MCST) for people with dementia. *Int J Geriatr Psychiatry*  
5  
6 2005;20(5):446-51  
7
- 8  
9 11.American Geriatrics Society. Guideline for the prevention of falls in  
10  
11 older persons. *J Am Geriatr Soc* 2001;49:664–72  
12
- 13  
14 12.Mortimer JA, Ding D, Borenstein AR, et al. Changes in brain volume  
15  
16 and cognition in a randomized trial of exercise and social interaction  
17  
18 in a community-based sample of non-demented Chinese elders. *J*  
19  
20 *Alzheimers Dis* 2012;30(4):757-66.  
21  
22
- 23  
24 13.Yao L, Giordani B, Alexander NB. Developing a positive  
25  
26 emotion-motivated Tai Chi (PEM-TC) exercise program for older  
27  
28 adults with dementia. *Res Theory Nurs Pract* 2008;22(4):241-55  
29
- 30  
31 14.Klein PJ. Tai Chi Chuan in the management of Parkinson's disease and  
32  
33 Alzheimer's disease. *Med Sport Sci* 2008;52:173-81  
34
- 35  
36 15. Cheng ST, Chow PK, Song YQ, et al. Mental and Physical Activities  
37  
38 Delay Cognitive Decline in Older Persons with Dementia. *Am J Geriatr*  
39  
40 *Psychiatry* 2014;22(1):63-74  
41  
42
- 43  
44 16.Tai SY, Hsu CL, Huang SW, et al. Effects of multiple training modalities  
45  
46 in patients with Alzheimer's disease: a pilot study. *Neuropsychiatr Dis*  
47  
48 *Treat* 2016; 12:2843-2849  
49
- 50  
51 17.Jia J, Wang F, Wei C, et al. The prevalence of dementia in urban and  
52  
53 rural areas of China. *Alzheimers Dement* 2014;10(1):1-9  
54
- 55  
56 18.Wang ZY, Zhang MY, Qu GY, et al. Application of Chinese version of  
57  
58  
59  
60

- 1  
2  
3 the Mini-Mental State Examination (MMSE). *Shanghai Arch*  
4  
5  
6 *Psychiatry* 1989;7:108-111.  
7
- 8 19. Maj M, Satz P, Janssen R, et al. WHO Neuropsychiatric AIDS study,  
9  
10 cross-sectional phase II. Neuropsychological and neurological  
11  
12 findings. *Arch Gen Psychiatry* 1994;51(1):51-61.  
13
- 14 20. Yesavage JA, Brink TL, Rose TL, et al. Development and validation of a  
15  
16 geriatric depression screening scale: a preliminary report. *J Psychiatr*  
17  
18 *Res* 1982-83;17(1):37-49  
19  
20  
21
- 22 21. Wang T, Xiao S, Li X, et al. Reliability and validity of the Chinese  
23  
24 version of the neuropsychiatric inventory in mainland China. *Int J*  
25  
26 *Geriatr Psychiatry* 2012;27(5):539-44  
27  
28  
29
- 30 22. Mahoney FI, Barthel DW. Functional evaluation: the Barthel Index.  
31  
32  
33 *Md State Med J* 1965;14:61-5.  
34  
35  
36  
37  
38  
39  
40  
41  
42  
43  
44  
45  
46  
47  
48  
49  
50  
51  
52  
53  
54  
55  
56  
57  
58  
59  
60

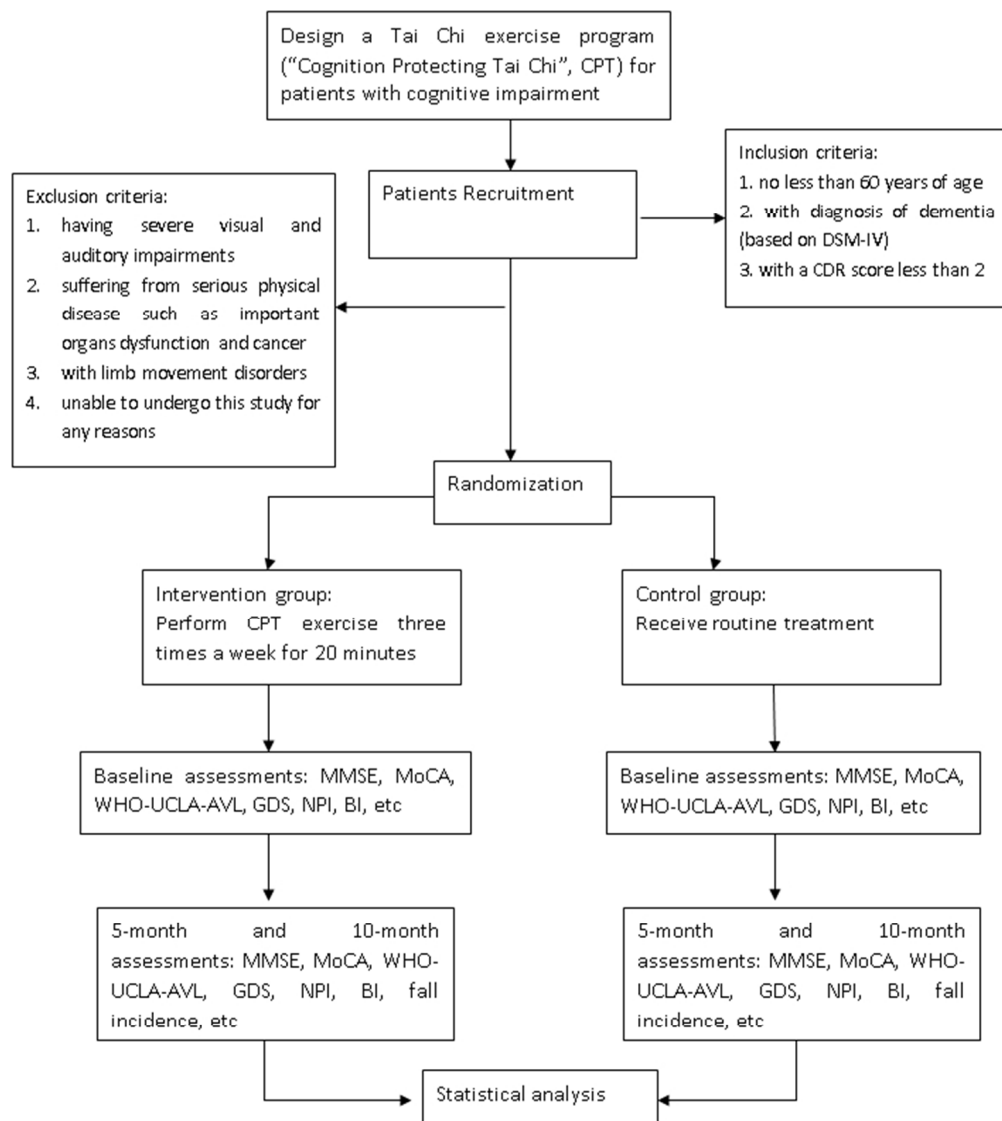

Figure 1. The study flow

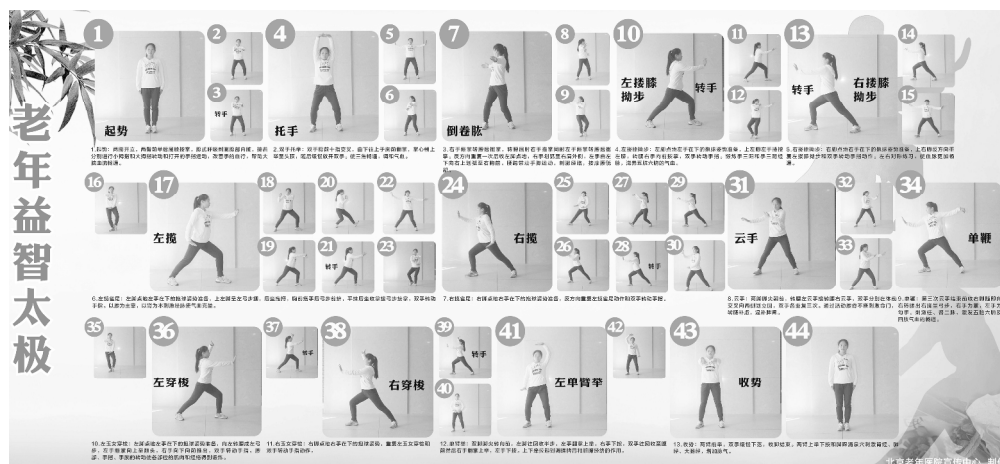

Figure 2. Main actions of Cognitive Protection Tai Chi (CPT)

3256x1493mm (72 x 72 DPI)

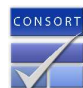

## CONSORT 2010 checklist of information to include when reporting a randomised trial\*

| Section/Topic                    | Item No | Checklist item                                                                                                                                                                              | Reported on page No |
|----------------------------------|---------|---------------------------------------------------------------------------------------------------------------------------------------------------------------------------------------------|---------------------|
| <b>Title and abstract</b>        |         |                                                                                                                                                                                             |                     |
|                                  | 1a      | Identification as a randomised trial in the title                                                                                                                                           | 1                   |
|                                  | 1b      | Structured summary of trial design, methods, results, and conclusions (for specific guidance see CONSORT for abstracts)                                                                     | 2                   |
| <b>Introduction</b>              |         |                                                                                                                                                                                             |                     |
| Background and objectives        | 2a      | Scientific background and explanation of rationale                                                                                                                                          | 4                   |
|                                  | 2b      | Specific objectives or hypotheses                                                                                                                                                           | 5-6                 |
| <b>Methods</b>                   |         |                                                                                                                                                                                             |                     |
| Trial design                     | 3a      | Description of trial design (such as parallel, factorial) including allocation ratio                                                                                                        | 7                   |
|                                  | 3b      | Important changes to methods after trial commencement (such as eligibility criteria), with reasons                                                                                          | Not applicable      |
| Participants                     | 4a      | Eligibility criteria for participants                                                                                                                                                       | 8                   |
|                                  | 4b      | Settings and locations where the data were collected                                                                                                                                        | 7                   |
| Interventions                    | 5       | The interventions for each group with sufficient details to allow replication, including how and when they were actually administered                                                       | 9                   |
| Outcomes                         | 6a      | Completely defined pre-specified primary and secondary outcome measures, including how and when they were assessed                                                                          | 11                  |
|                                  | 6b      | Any changes to trial outcomes after the trial commenced, with reasons                                                                                                                       | Not applicable      |
| Sample size                      | 7a      | How sample size was determined                                                                                                                                                              | 11                  |
|                                  | 7b      | When applicable, explanation of any interim analyses and stopping guidelines                                                                                                                | Not applicable      |
| <b>Randomisation:</b>            |         |                                                                                                                                                                                             |                     |
| Sequence generation              | 8a      | Method used to generate the random allocation sequence                                                                                                                                      | 9                   |
|                                  | 8b      | Type of randomisation; details of any restriction (such as blocking and block size)                                                                                                         | 9                   |
| Allocation concealment mechanism | 9       | Mechanism used to implement the random allocation sequence (such as sequentially numbered containers), describing any steps taken to conceal the sequence until interventions were assigned | 9                   |

|    |                                                      |     |                                                                                                                                                   |                               |
|----|------------------------------------------------------|-----|---------------------------------------------------------------------------------------------------------------------------------------------------|-------------------------------|
| 1  |                                                      |     |                                                                                                                                                   |                               |
| 2  | Implementation                                       | 10  | Who generated the random allocation sequence, who enrolled participants, and who assigned participants to interventions                           | 9                             |
| 3  |                                                      |     |                                                                                                                                                   |                               |
| 4  | Blinding                                             | 11a | If done, who was blinded after assignment to interventions (for example, participants, care providers, those assessing outcomes) and how          | Not applicable                |
| 5  |                                                      | 11b | If relevant, description of the similarity of interventions                                                                                       | Not applicable                |
| 6  |                                                      |     |                                                                                                                                                   |                               |
| 7  |                                                      |     |                                                                                                                                                   |                               |
| 8  |                                                      |     |                                                                                                                                                   |                               |
| 9  | Statistical methods                                  | 12a | Statistical methods used to compare groups for primary and secondary outcomes                                                                     | 12                            |
| 10 |                                                      | 12b | Methods for additional analyses, such as subgroup analyses and adjusted analyses                                                                  | 12                            |
| 11 |                                                      |     |                                                                                                                                                   |                               |
| 12 | <b>Results</b>                                       |     |                                                                                                                                                   |                               |
| 13 | Participant flow (a diagram is strongly recommended) | 13a | For each group, the numbers of participants who were randomly assigned, received intended treatment, and were analysed for the primary outcome    | Not applicable for a protocol |
| 14 |                                                      | 13b | For each group, losses and exclusions after randomisation, together with reasons                                                                  | Not applicable                |
| 15 |                                                      |     |                                                                                                                                                   |                               |
| 16 |                                                      |     |                                                                                                                                                   |                               |
| 17 |                                                      |     |                                                                                                                                                   |                               |
| 18 | Recruitment                                          | 14a | Dates defining the periods of recruitment and follow-up                                                                                           | Not applicable                |
| 19 |                                                      | 14b | Why the trial ended or was stopped                                                                                                                | Not applicable                |
| 20 |                                                      |     |                                                                                                                                                   |                               |
| 21 |                                                      |     |                                                                                                                                                   |                               |
| 22 |                                                      |     |                                                                                                                                                   |                               |
| 23 | Baseline data                                        | 15  | A table showing baseline demographic and clinical characteristics for each group                                                                  | Not applicable                |
| 24 |                                                      |     |                                                                                                                                                   |                               |
| 25 |                                                      |     |                                                                                                                                                   |                               |
| 26 | Numbers analysed                                     | 16  | For each group, number of participants (denominator) included in each analysis and whether the analysis was by original assigned groups           | Not applicable                |
| 27 |                                                      |     |                                                                                                                                                   |                               |
| 28 | Outcomes and estimation                              | 17a | For each primary and secondary outcome, results for each group, and the estimated effect size and its precision (such as 95% confidence interval) | Not applicable                |
| 29 |                                                      | 17b | For binary outcomes, presentation of both absolute and relative effect sizes is recommended                                                       | Not applicable                |
| 30 |                                                      |     |                                                                                                                                                   |                               |
| 31 |                                                      |     |                                                                                                                                                   |                               |
| 32 | Ancillary analyses                                   | 18  | Results of any other analyses performed, including subgroup analyses and adjusted analyses, distinguishing pre-specified from exploratory         | Not applicable                |
| 33 |                                                      |     |                                                                                                                                                   |                               |
| 34 | Harms                                                | 19  | All important harms or unintended effects in each group (for specific guidance see CONSORT for harms)                                             | Not applicable                |
| 35 |                                                      |     |                                                                                                                                                   |                               |
| 36 |                                                      |     |                                                                                                                                                   |                               |
| 37 |                                                      |     |                                                                                                                                                   |                               |
| 38 |                                                      |     |                                                                                                                                                   |                               |
| 39 |                                                      |     |                                                                                                                                                   |                               |
| 40 | <b>Discussion</b>                                    |     |                                                                                                                                                   |                               |
| 41 | Limitations                                          | 20  | Trial limitations, addressing sources of potential bias, imprecision, and, if relevant, multiplicity of analyses                                  | Not applicable                |
| 42 |                                                      |     |                                                                                                                                                   |                               |

1  
2  
3  
4  
5  
6  
7  
8  
9  
10  
11  
12  
13  
14  
15  
16  
17  
18  
19  
20  
21  
22  
23  
24  
25  
26  
27  
28  
29  
30  
31  
32  
33  
34  
35  
36  
37  
38  
39  
40  
41  
42  
43  
44  
45  
46  
47

|                          |    |                                                                                                               |                           |
|--------------------------|----|---------------------------------------------------------------------------------------------------------------|---------------------------|
|                          |    |                                                                                                               | <u>applicable</u>         |
| Generalisability         | 21 | Generalisability (external validity, applicability) of the trial findings                                     | Not applicable            |
| Interpretation           | 22 | Interpretation consistent with results, balancing benefits and harms, and considering other relevant evidence | Not applicable            |
| <b>Other information</b> |    |                                                                                                               |                           |
| Registration             | 23 | Registration number and name of trial registry                                                                | <u>3</u>                  |
| Protocol                 | 24 | Where the full trial protocol can be accessed, if available                                                   | <u>This is a protocol</u> |
| Funding                  | 25 | Sources of funding and other support (such as supply of drugs), role of funders                               | <u>13</u>                 |

\*We strongly recommend reading this statement in conjunction with the CONSORT 2010 Explanation and Elaboration for important clarifications on all the items. If relevant, we also recommend reading CONSORT extensions for cluster randomised trials, non-inferiority and equivalence trials, non-pharmacological treatments, herbal interventions, and pragmatic trials. Additional extensions are forthcoming: for those and for up to date references relevant to this checklist, see [www.consort-statement.org](http://www.consort-statement.org).

# BMJ Open

## The Efficacy of Practicing Tai Chi for Older People with Mild Dementia: Protocol for a Pilot Randomized Controlled Study

|                                 |                                                                                                                                                                                                                                                                                                                                                                                                                                                                                                                                                                                                                                                                                                                                                                                                                                                                                                                                                                                                                                                                                                                               |
|---------------------------------|-------------------------------------------------------------------------------------------------------------------------------------------------------------------------------------------------------------------------------------------------------------------------------------------------------------------------------------------------------------------------------------------------------------------------------------------------------------------------------------------------------------------------------------------------------------------------------------------------------------------------------------------------------------------------------------------------------------------------------------------------------------------------------------------------------------------------------------------------------------------------------------------------------------------------------------------------------------------------------------------------------------------------------------------------------------------------------------------------------------------------------|
| Journal:                        | <i>BMJ Open</i>                                                                                                                                                                                                                                                                                                                                                                                                                                                                                                                                                                                                                                                                                                                                                                                                                                                                                                                                                                                                                                                                                                               |
| Manuscript ID                   | bmjopen-2017-019940.R1                                                                                                                                                                                                                                                                                                                                                                                                                                                                                                                                                                                                                                                                                                                                                                                                                                                                                                                                                                                                                                                                                                        |
| Article Type:                   | Protocol                                                                                                                                                                                                                                                                                                                                                                                                                                                                                                                                                                                                                                                                                                                                                                                                                                                                                                                                                                                                                                                                                                                      |
| Date Submitted by the Author:   | 08-Mar-2018                                                                                                                                                                                                                                                                                                                                                                                                                                                                                                                                                                                                                                                                                                                                                                                                                                                                                                                                                                                                                                                                                                                   |
| Complete List of Authors:       | <p>Lyu, Jihui; Beijing Geriatric Hospital, Center for Cognitive Disorders; Capital Medical University, Alzheimer's disease Center, Beijing Institute for Brain Disorders</p> <p>Li, Wenjie; Beijing Geriatric Hospital, Center for Cognitive Disorders</p> <p>Rong, Xiangjiang; Capital University of Physical Education and Sport, School of Kinesiology and Health</p> <p>Wei, Lian ; Capital University of Physical Education and Sport, Graduate School</p> <p>Huang, Nayan; Beijing Geriatric Hospital, Center for Cognitive Disorders; Capital Medical University, Alzheimer's disease Center, Beijing Institute for Brain Disorders</p> <p>Champ, Mei; University of the West of England, Department of Nursing and Midwifery</p> <p>Xiong, Qian; Lancaster University, Centre for Ageing Research, Division of Health Research, Faculty of Health and Medicine</p> <p>Chen, Xueli; Beijing Geriatric Hospital, Department of Rehabilitation</p> <p>Li, Mo; Beijing Geriatric Hospital, Center for Cognitive Disorders</p> <p>Li, Fangling; Beijing Geriatric Hospital, Department of Traditional Chinese Medicine</p> |
| <b>Primary Subject Heading</b>: | Geriatric medicine                                                                                                                                                                                                                                                                                                                                                                                                                                                                                                                                                                                                                                                                                                                                                                                                                                                                                                                                                                                                                                                                                                            |
| Secondary Subject Heading:      | Neurology, Rehabilitation medicine                                                                                                                                                                                                                                                                                                                                                                                                                                                                                                                                                                                                                                                                                                                                                                                                                                                                                                                                                                                                                                                                                            |
| Keywords:                       | Tai Chi, cognitive function, Dementia < NEUROLOGY                                                                                                                                                                                                                                                                                                                                                                                                                                                                                                                                                                                                                                                                                                                                                                                                                                                                                                                                                                                                                                                                             |
|                                 |                                                                                                                                                                                                                                                                                                                                                                                                                                                                                                                                                                                                                                                                                                                                                                                                                                                                                                                                                                                                                                                                                                                               |

SCHOLARONE™  
Manuscripts



1  
2  
3 **The Efficacy of Practicing Tai Chi for Older People with Mild**  
4  
5  
6 **Dementia: Protocol for a Pilot Randomized Controlled Study**  
7

8  
9 Jihui Lyu<sup>1,2†\*</sup>, Wenjie Li<sup>1†</sup>, Xiangjiang Rong<sup>3†</sup>, Lian Wei<sup>4</sup>, Nayan Huang<sup>1,2</sup>,  
10  
11 Mei Champ<sup>5</sup>, Qian Xiong<sup>6</sup>, Xueli Chen<sup>7</sup>, Mo Li<sup>1</sup>, Fangling Li<sup>8</sup>  
12

13  
14 <sup>1</sup>Center for Cognitive Disorders, Beijing Geriatric Hospital, Beijing 100095, China  
15

16 <sup>2</sup>Alzheimer's disease Center, Beijing Institute for Brain Disorders, Capital Medical  
17  
18 University, Beijing 100069, China  
19

20  
21 <sup>3</sup>School of Kinesiology and Health, Capital University of Physical Education and Sport,  
22  
23 Beijing 100191, China  
24

25  
26 <sup>4</sup>Graduate School, Capital University of Physical Education and Sport, Beijing 100191,  
27  
28 China  
29

30  
31 <sup>5</sup>Department of Nursing and Midwifery, University of the West of England, United  
32  
33 Kingdom  
34

35  
36 <sup>6</sup>Centre for Ageing Research, Division of Health Research, Faculty of Health and  
37  
38 Medicine, Lancaster University, United Kingdom  
39

40  
41 <sup>7</sup>Department of Rehabilitation, Beijing Geriatric Hospital, Beijing 100095, China  
42

43  
44 <sup>8</sup>Department of Traditional Chinese Medicine, Beijing Geriatric Hospital, Beijing  
45  
46 100095, China  
47

48  
49 † These authors contributed equally to this work.  
50

51 **Correspondence to:** Dr Jihui Lyu, Email: lvjihui@139.com  
52

53  
54 **Key words:** dementia, Tai Chi, cognitive function  
55

**Word count: 2932**

For peer review only

1  
2  
3  
4  
5  
6  
7  
8  
9  
10  
11  
12  
13  
14  
15  
16  
17  
18  
19  
20  
21  
22  
23  
24  
25  
26  
27  
28  
29  
30  
31  
32  
33  
34  
35  
36  
37  
38  
39  
40  
41  
42  
43  
44  
45  
46  
47  
48  
49  
50  
51  
52  
53  
54  
55  
56  
57  
58  
59  
60

## ABSTRACT

### Introduction

Many studies suggest that Tai Chi exercise is a safe and appropriate mind-body exercise for older people and effectively slows down age-related cognitive decline. A set of bespoke Tai Chi exercise named “Cognition Protecting Tai Chi” (CPT) has been created for older people with cognitive impairments by the research team of geriatricians, neurologists, rehabilitation specialists, experts of sports medicine, and experienced practitioners of traditional Chinese medicine. This trial is designed to evaluate its effects on cognitive function, behavior/moods, risk of falls and activities of daily living of the participants with mild dementia.

### Methods and analysis

A randomized controlled study will be conducted. Eighty participants with mild dementia will be recruited and randomly allocated to an intervention group and a control group. The intervention group will practice the CPT three times a week for 20 minutes each time under the guidance of professional therapists. The control group will continue receiving their routine treatments. The duration of this study will be 10 months. All participants will be assessed with a battery of neuropsychological and functional evaluations, which include Mini-Mental State Examination, Montreal Cognitive Assessment, the

1  
2  
3 World Health Organization–University of California Los Angeles Auditory  
4  
5 Verbal Learning test (WHO-UCLA-AVLT), Trail Making Test (TMT),  
6  
7  
8 Geriatric Depression Scale, Neuropsychological Inventory and Barthel  
9  
10 Index, at the baseline, five and ten months during the study period. Fall  
11  
12 incident will also be recorded. The primary outcome will be the  
13  
14 WHO-UCLA-AVLT delayed recall score. The secondary outcome will be  
15  
16 the TMT score.  
17  
18  
19

### 20 **Ethics and dissemination**

21  
22 This study has been approved by the ethical review committee of the  
23  
24 Beijing Geriatric Hospital (protocol number: 2015-021). Informed  
25  
26 consent will be obtained from all participants or their guardians. The  
27  
28 authors intend to submit the findings of the study to peer-reviewed  
29  
30 journals or academic conferences to be published.  
31  
32  
33  
34

### 35 **Trial registration number**

36  
37 ChiCTR-INR-16009872 (<http://www.chictr.org.cn>)  
38  
39  
40  
41  
42  
43  
44  
45  
46  
47  
48  
49  
50  
51  
52  
53  
54  
55  
56  
57  
58  
59  
60

### Strengths and limitations of this study

- ▶ The bespoke CPT is specially designed for older people with mild dementia by the research team of multidisciplinary professionals. The team consist of geriatricians, neurologists, rehabilitation specialists, experts of sports medicine, and experienced practitioners of traditional Chinese medicine.
- ▶ The randomized controlled trial design minimizes the risk of selection bias.
- ▶ As the sample size is calculated based on the primary outcome, this pilot study may fail to demonstrate statistical differences of secondary outcomes.
- ▶ An open-label study design is often viewed as leaning towards bias, however it is not feasible to achieve a blinded intervention for this study. Therefore special measures for randomization and data collection process will be incorporated into the study to reduce bias.

## INTRODUCTION

There are various clinical symptoms of people with dementia, which usually start with cognitive impairments, such as memory loss, and then complaints of inattention, miscalculation, lack of logical reasoning and disorientation<sup>1</sup>. Besides cognitive impairments, people with dementia may also experience some changes psychologically and physically. There might be changes in personality, mood swings, ability to communicate and behaviors. It is often observed that patients with dementia feel anxious, depressed and may become verbally and physically aggressive. As the disease progresses, these symptoms gradually affect their ability in maintaining their activities of daily living, which leads to loss of independence. Current pharmacologic interventions used to maintain cognitive function, such as acetylcholinesterase inhibitors and memantine, have limited efficacy, and there are usually side effects<sup>2-5</sup>. Meanwhile, typical and atypical antipsychotics for dementia have the same or even severe side effects.

According to neuroplasticity theory, the repetition of stimulate-reflect training can help patients with dementia in preservation and restoration of brain functions, even when the brain has pathological damage to some extent<sup>6</sup>. There has been a considerable focus on the non-pharmacological approach to enhancing cognition. Many studies suggest that mind-body exercise can efficiently prevent the onset of

1  
2  
3 dementia by delaying age-related cognitive decline, and benefit the  
4  
5 prognosis of dementia<sup>7-10</sup>.  
6  
7

8 As one of traditional Chinese martial arts, Tai Chi is an aerobic  
9  
10 mind-body exercise with mild-to-moderate physical movements that are  
11  
12 safe for older people<sup>11</sup>. Tai Chi requires mind concentration and shifting  
13  
14 the balance of body in accordance with gentle and smooth movements  
15  
16 and steady breathing. In the theory of traditional Chinese medicine, Qi  
17  
18 (Qi is one of the fixed technical terms in traditional Chinese medicine,  
19  
20 referring to behavioral patterns seen to occur through the spatial  
21  
22 extension of a physical medium, which is both activity and active  
23  
24 substance) and blood are the two most fundamental materials to  
25  
26 maintain human life activities. Qi and blood can both be mobilized  
27  
28 coordinately when practicing Tai Chi, which helps maintain the balance  
29  
30 of Yin and Yang (the two opposite properties of all natural things in  
31  
32 traditional Chinese medicine) and improves harmony of human body<sup>12</sup>.  
33  
34 As the nature of Tai Chi exercise strengthens the muscles of lower limbs  
35  
36 of the body, it helps improve stability and minimize the risk of falls<sup>11</sup>. Tai  
37  
38 Chi is a recommended exercise for fall prevention in older people by the  
39  
40 American Geriatrics Society, because it not only improves muscular  
41  
42 strength, co-ordination and balance, but also is an enjoyable activity  
43  
44 with a potential as a long-term exercise regime<sup>13</sup>. A randomized trial in  
45  
46 older Chinese people without dementia carried out by Mortimer, et al in  
47  
48  
49  
50  
51  
52  
53  
54  
55  
56  
57  
58  
59  
60

1  
2  
3  
4 2012 suggest that Tai Chi increases brain volume and improves cognitive  
5  
6 function more effectively than the intervention of social interaction<sup>14</sup>.  
7  
8 Evidence has also shown that Tai Chi is an appropriate exercise for  
9  
10 individuals with dementia in early stages, which helps improve quality of  
11  
12 life, brain function inducing reconstruction of neurons, and Tai Chi could  
13  
14 become an emerging alternative therapy for people with dementia<sup>15-17</sup>.  
15  
16  
17 Other studies reported that physical exercise like Tai Chi improved mood  
18  
19 and alleviated psychiatric problems in early or middle stages of dementia  
20  
21 and also significantly reduced caregiver distresses<sup>18</sup>. For example, Sticky  
22  
23 Hands Tai Chi, a special Tai Chi training technique practiced with a  
24  
25 partner, promoted a comforting intimate interaction between the two  
26  
27 persons and improved exercise adherence and mood in older people  
28  
29 with dementia<sup>15</sup>.  
30  
31  
32  
33  
34

35 China has the largest number of older people with dementia<sup>19</sup> and Tai  
36  
37 Chi is originated from China. Tai Chi experts in China have developed  
38  
39 various programs of Tai Chi, but none is especially designed for older  
40  
41 people with cognitive impairments. Therefore, a set of Tai Chi program  
42  
43 named "Cognition Protecting Tai Chi" (CPT) has been designed by the  
44  
45 research team of multidisciplinary professionals in the first stage of this  
46  
47 study. The second stage of this study is to test the effectiveness of the  
48  
49 CPT program in improving cognitive function, and to evaluate its effects  
50  
51 and impacts on psychological behavior, mood swings, risk of falls and  
52  
53  
54  
55  
56  
57  
58  
59  
60



1  
2  
3 ability in maintaining activities of daily living for people with mild  
4 dementia with comparison to usual care. If results are positive, it would  
5 demonstrate the potential to become a routine cost-effective exercise  
6 for older people with mild dementia.  
7  
8  
9  
10  
11  
12  
13  
14

## 15 **METHODS**

16  
17  
18 **Settings:** This study is designed at Center for Cognitive Disorders of  
19 Beijing Geriatric Hospital (BGH). The Case Report Forms will be kept and  
20 research data will be analyzed by BGH. This hospital is a tertiary hospital  
21 which is the highest rank in China's hospital system in terms of capacity  
22 of beds and research capability. BGH has 900 inpatient beds and is  
23 located in Haidian District of Beijing. The Center for Cognitive Disorders  
24 of BGH is a department serving older people with cognitive impairments.  
25 It is also the Guidance Center for Cognitive Rehabilitation of Haidian  
26 District. The recruitment, assessment, intervention, and follow-ups of  
27 participants will be conducted at three long-term care facilities near BGH  
28 at where the participants reside.  
29  
30  
31  
32  
33  
34  
35  
36  
37  
38  
39  
40  
41  
42  
43  
44

### 45 **Patient and Public Involvement**

46  
47 Information leaflets of the study will be available at the three long-term  
48 care facilities. The leaflets explain in full detail the aims and objectives of  
49 the study, selection criteria and the processes that the study will be  
50 adhering to. The research team will provide an individual face to face  
51  
52  
53  
54  
55  
56  
57  
58  
59  
60

1  
2  
3  
4 consultation to all applicants or their guardian to answer any questions  
5  
6 they may have. The applicants can then discuss this with their family if  
7  
8 they wish and make a decision to opt in or opt out the study prior to  
9  
10 signing the consent form. The findings of this study will be made  
11  
12 available to the participants and their guardians.  
13  
14

### 15 **Study design**

16  
17  
18 There are two stages in this study design (Figure 1).  
19

20  
21 The first stage is the development of the CPT program by the research  
22  
23 team. The CPT program was specifically designed for cognitively  
24  
25 impaired patients by a research team of geriatricians, neurologists,  
26  
27 rehabilitation specialists, experts of sports medicine, and experienced  
28  
29 practitioners of traditional Chinese medicine in 2016. The team has  
30  
31 modified the traditional Chinese Tai Chi to suit people with mild  
32  
33 dementia. Any unsafe and complex actions in the traditional eight style  
34  
35 Tai Chi program was removed, and some movements which were  
36  
37 thought to be more beneficial for cognitive functions were added based  
38  
39 on theories of traditional Chinese medical science. For example, the  
40  
41 researchers removed the posture of standing on one foot and added  
42  
43 some movements of rotating wrists and fingers in consideration of the  
44  
45 suitability and safety aspects of the program for people with dementia.  
46  
47  
48  
49  
50  
51  
52 The CPT program contains eight styles of Tai Chi movements and each  
53  
54 movement can be divided into three different maneuvers. Between  
55  
56  
57  
58  
59  
60

1  
2  
3  
4 January 2017 and May 2017, the CPT has been piloted with five patients  
5  
6 with mild dementia who were invited to learn and practice the CPT  
7  
8 program for four weeks. The CPT has been further modified where  
9  
10 necessary based on the comments and the feedback provided by the  
11  
12 participants before the completion of final version of the CPT.  
13  
14

15  
16 In addition to routine Starting Posture and Closing Form, there are  
17  
18 eight styles of Tai Chi movements in the CPT, including Raising Both  
19  
20 Hands, Forearm Rolling on Both Sides, Brush Knee and Twist Step on  
21  
22 Both sides, Grasp the Bird's Tail-Left Side and then Right Side,  
23  
24 Cloud Hands, Single Whip, Work at Shuttles on Both Sides, and Raising  
25  
26 Left and then Right Hand (Figure 2).  
27  
28

29  
30 The second stage is a randomized controlled trial which will be  
31  
32 conducted to test the effectiveness of the CPT program.  
33  
34

### 35 **Recruitment of participants**

36  
37 Participants will be recruited from long-term care facilities near BGH.  
38  
39 These facilities are Wenquan nursing home, Lengquan nursing home,  
40  
41 and Hexihui nursing home. There are altogether more than one  
42  
43 thousand older residents living in these nursing homes, thus sufficient  
44  
45 samples can be provided. Residents who meet the inclusion criteria will  
46  
47 be recruited. Written consent forms will be signed by all participants or  
48  
49 their guardians.  
50  
51  
52  
53

### 54 **Inclusion criteria**

1  
2  
3 Residents aged 60 years or older with mild dementia (diagnosis is based  
4 on The Diagnostic and Statistical Manual of Mental Disorders, 4th  
5 edition), who have a Clinical Dementia Rating score less than 2 will be  
6 enrolled into this study.  
7  
8  
9  
10  
11  
12

### 13 **Exclusion criteria**

14  
15 Residents who have severe visual or auditory impairment, serious  
16 medical conditions in major organs (such as heart, lung, kidney, liver and  
17 so on), illnesses affecting mobility, or are unable to accept assessments  
18 or interventions which are required in this study for any reasons.  
19  
20  
21  
22  
23  
24

### 25 **Randomization and allocation sequence**

26  
27 Participants will be enrolled by dementia specialists. The  
28 randomization will be carried out by an independent research assistant  
29 who will not be involved in the enrollment, assessment, or intervention  
30 of the participants. Random number sequences will be generated using  
31 SAS software. Sealed envelopes with the serial number outside and  
32 group number inside will be produced and kept in a locked drawer which  
33 will be inaccessible to all the researchers. The envelopes will be opened  
34 sequentially by the independent research assistant after baseline  
35 assessments and participants will be assigned to two groups (i.e. one  
36 intervention group and one control group) at a ratio of 1:1 according to  
37 the group number printed inside the envelopes. Outcome evaluators and  
38 data analysts will be blinded to the group assignment.  
39  
40  
41  
42  
43  
44  
45  
46  
47  
48  
49  
50  
51  
52  
53  
54  
55  
56  
57  
58  
59  
60

## Intervention

This study is designed as a 10 month-randomized controlled trial. In addition to their routine treatment and usual care for ADL, the intervention group will perform the CPT exercise three times a week for 20 minutes each time under the guidance of the professional therapists at where the participants reside. The intervention will be practiced in groups with one therapist to five to eight participants. The control group will only receive routine treatments and usual care for ADL. The intervention to the participant should be discontinued if any complication that could affect the outcomes of the CPT occurs. The participants will be encouraged to complete follow-ups. The participants and their representatives have access to the research team anytime if they need to discuss any issues or concerns during the study period. The participants will be explained that they can discontinue with the intervention at any time during the period of the study. Demographic information of participants who withdraw from the study after randomization and the reasons for their withdrawal will be collected.

## Assessment

The trial will utilize the most commonly used tools (see below) that have been carefully selected to assess the efficacy of CPT. The Chinese version of Mini Mental State Examination (MMSE)<sup>20</sup> is a 30-point questionnaire which is used to measure cognitive impairments. It examines functions

1  
2  
3  
4 of attention, calculation, recall, language, ability to follow simple  
5  
6 commands and orientation.  
7

8 The Montreal Cognitive Assessment (MoCA) Beijing version  
9  
10 (www.mocatest.org) is also a 30-point test for assessing cognitive  
11  
12 function. MoCA includes cognitive domains for short-term memory recall,  
13  
14 visuospatial abilities, multiple aspects of executive functions, attention,  
15  
16 concentration and working memory, language and orientation to time  
17  
18 and place. Because there are more difficult and multiple tasks in MoCA,  
19  
20 MoCA is more sensitive to detect mild cognitive changes than MMSE  
21  
22 does<sup>21</sup>.  
23  
24  
25  
26  
27

28 The World Health Organization–University of California Los Angeles  
29  
30 Auditory Verbal Learning test (WHO-UCLA-AVL)<sup>22</sup> is a tool to assess  
31  
32 immediate recall and delayed recall with 15 words independent in  
33  
34 meaning. Immediate recall is performed by asking the participants to  
35  
36 remember and recall those 15 words just after each auditory learning,  
37  
38 and this learning-recall process is repeated for three times to generate  
39  
40 an average performance score. An average performance is recorded.  
41  
42  
43  
44  
45 Delayed recall is performed by asking the participants to recall those 15  
46  
47 words 30-45 minutes after the immediate recall has been completed.  
48  
49

50 The study utilizes the method of the Trail Making Test (TMT) which is a  
51  
52 neuropsychological test of visual attention and task switching. It can  
53  
54 provide information on visual search speed, scanning, speed of  
55  
56  
57

1  
2  
3 processing, mental flexibility, as well as executive functioning. A Chinese  
4 version of Shape TMT was used in this study. This Shape TMT shows  
5 numbers from 1 to 25 twice, once in a circle and once in a square. The  
6 participants are asked to connect them in sequential order alternately  
7 between circles and squares (circle 1, square 1, circle 2, square 2, etc.)<sup>23</sup>.  
8  
9 This Shape TMT has been proved to be a sensitive test of visual search  
10 and sequencing<sup>24</sup>.  
11  
12  
13  
14  
15  
16  
17  
18  
19

20 The Geriatric Depression Scale (GDS)<sup>25</sup> is a 30-item self-report  
21 assessment used to identify depression in the elderly, of which questions  
22 are answered in a "yes" or "no" format. It is appropriate to test older  
23 individuals with mild or moderate cognitive impairment using GDS.  
24  
25  
26  
27  
28  
29

30 The Neuropsychiatric Inventory (NPI)<sup>26</sup> assesses common psychiatric  
31 and behavioral symptoms in dementia. Its items include hallucinations,  
32 delusions, agitation/aggression, dysphoria/depression, anxiety,  
33 irritability, disinhibition, euphoria, apathy, aberrant motor behavior,  
34 sleep and night-time behavior disturbance, appetite and eating disorders.  
35 Information can be obtained from caregivers who have in-depth  
36 knowledge of the patients' performance. The caregivers will also be  
37 asked to rate their own distress level associated with daily care and  
38 support provided by them to the patients.  
39  
40  
41  
42  
43  
44  
45  
46  
47  
48  
49  
50  
51

52 The Barthel Index (BI)<sup>27</sup> is an ordinal scale used to measure  
53 performance in ADL. The ten variables describing ADL and mobility  
54  
55  
56  
57

1  
2  
3 addressed in the Barthel scale are: presence or absence of fecal  
4  
5 incontinence, urinary incontinence, grooming, toileting, feeding,  
6  
7 transferring (e.g. from chair to bed), walking, dressing, climbing stairs  
8  
9 and bathing. The scoring is based on information provided by the  
10  
11 participant's informant, who can be his/her family members or  
12  
13 caregivers.  
14  
15  
16

17  
18 All participants will undergo all above assessments at 0 (baseline), five  
19  
20 and ten months within the current study period. Fall incident will also be  
21  
22 recorded. Fall will be defined as the experience of a sudden, involuntary,  
23  
24 unintentional change of position, down on the ground or on a lower  
25  
26 plane. When assessing a definite fall, the team will try to get an  
27  
28 eyewitness account or records of security cameras (all the areas of the  
29  
30 nursing homes where participants live will be monitored by 24-hour  
31  
32 security cameras).  
33  
34  
35  
36

### 37 38 **Outcomes**

39  
40 The psychometric tools used in this study will be analyzed to assess the  
41  
42 efficacy of the CPT. The primary outcome is the WHO-UCLA-AVLT delayed  
43  
44 recall score. The secondary outcome is the score of the TMT. The fall  
45  
46 incident will be analyzed to assess the safety of this Tai Chi program.  
47  
48 Complaints of medical symptoms related to the intervention will be  
49  
50 documented and treated when necessary, including fatigue, pain,  
51  
52 dizziness, and so on.  
53  
54  
55  
56



### **Sample size**

The sample size was calculated by Power Analysis and Sample Size Calculation Statistical Software V13.0 based on the results of pre-experiment of this study. Using a type I error of 0.05 and a power of 80%, a mean difference of 2 points is expected between two groups after 10 months. The results show a sample size of 34 per groups is adequate for testing the primary outcome (WHO-UCLA-AVLT delayed recall score). Considering a 15% dropout rate, a total number of 80 participants will be recruited.

### **Quality control and quality assurance**

At least three dementia specialists will work together to examine the participants and provide diagnosis for each participant. All data will be monitored and reviewed by the PI or research coordinators. Training will be provided to all researchers. Consistency coefficients in scoring assessment scales between researchers should be no less than 0.85. Data entry will be verified by a second researcher in the team. To protect participants' confidentiality, only supervisors, researchers of this study and the ethics committee will be authorized to have access to the personal information and medical records of the participants.

### **Statistical method**

All analyses will be carried out using SPSS version 16.0. The variations of scores of psychometric assessments over time between two groups will

1  
2  
3  
4 be examined using repeated measurement of variance analysis. The  
5  
6 association between intervention and incidence of falls will be analyzed  
7  
8 using Chi-Square test.  
9

## 10 11 12 13 **CONCLUSION**

14  
15 This protocol outlined the objectives of the study and explained the CPT  
16  
17 exercise developed by the research team including geriatricians,  
18  
19 neurologists, rehabilitation specialists, experts of sports medicine, and  
20  
21 experienced practitioners of in traditional Chinese medicine. The study is  
22  
23 designed as a randomized controlled trial in order to evaluate the effects  
24  
25 of this especially designed CPT on the participants with mild dementia.  
26  
27  
28  
29

## 30 31 **Contributors**

32  
33 Jihui Lyu conceived the idea and supervised this study and is the  
34  
35 guarantor. Jihui Lyu, Xiangjiang Rong, Xueli Chen, Fangling Li, Wenjie Li  
36  
37 and Lian Wei were involved in the design. Wenjie Li, Nayan Huang and  
38  
39 Xiangjiang Rong prepared draft manuscript. Jihui Lyu, Mei Champ, and  
40  
41 Qian Xiong revised the manuscript. Wenjie Li, Mo Li and Xiangjiang Rong  
42  
43 carried out the statistical calculation. All authors approved submission of  
44  
45 this manuscript.  
46  
47  
48  
49

## 50 51 **Acknowledgements**

52  
53 We thank Kai Hao (a staff of Publicity and Education Centre of BGH) for  
54  
55 helping us to improve the images of this article. We thank all the  
56  
57  
58  
59  
60

1  
2  
3 participants and their advisors for their cooperation.  
4

5  
6 **Funding**  
7

8 This work is supported by Beijing Clinical Characteristics Project of  
9  
10 Beijing Municipal Science and Technology Commission (Project number  
11  
12 Z151100004015023)  
13  
14

15  
16 **Competing interests**  
17

18 None declared.  
19

20 **Ethical approval:** This study was approved by the ethical review  
21  
22 committee of the Beijing Geriatric Hospital (Beijing, China).  
23  
24  
25

26  
27  
28 **REFERENCES**  
29

- 30 1. Bassil N, Mollaei C. Alzheimer's dementia: a brief review. *J Med Liban*  
31  
32 2012;60(4):192-9  
33  
34  
35 2. Qaseem A, Snow V, Cross JT, Jr., et al. Current pharmacologic  
36  
37 treatment of dementia: a clinical practice guideline from the  
38  
39 American College of Physicians and the American Academy of Family  
40  
41 Physicians. *Ann Intern Med* 2008;148:370-8  
42  
43  
44  
45 3. Schneider LS, Dagerman KS, Insel P. Risk of death with atypical  
46  
47 antipsychotic drug treatment for dementia: meta-analysis of  
48  
49 randomized placebo-controlled trials. *JAMA* 2005;294:1934-43  
50  
51  
52  
53 4. Schneider LS, Tariot PN, Dagerman KS, et al. Effectiveness of atypical  
54  
55 antipsychotic drugs in patients with Alzheimer's disease. *N Engl J Med*  
56  
57

- 2006;355:1525-38
5. Schneider LS, Dagerman K, Insel PS. Efficacy and adverse effects of atypical antipsychotics for dementia: meta-analysis of randomized, placebo-controlled trials. *Am J Geriatr Psychiatry* 2006;14:191-210
  6. Smith GS. Aging and neuroplasticity. *Dialogues Clin Neurosci* 2013;15(1):3-5
  7. National Collaborating Centre for Mental Health. Dementia: a NICE–SCIE guideline on supporting people with dementia and their carers in health and social care. London: British Psychological Society, 2007
  8. Cheng ST, Chow PK, Yu EC, et al. Leisure activities alleviate depressive symptoms in nursing home residents with very mild or mild dementia. *Am J Geriatr Psychiatry* 2012;20(10):904-8
  9. Knapp M, Thorgrimsen L, Patel A, Cognitive stimulation therapy for people with dementia: cost-effectiveness analysis. *Br J Psychiatry* 2006;188:574-80
  10. Orrell M, Spector A, Thorgrimsen L, Woods B., et al. A pilot study examining the effectiveness of maintenance Cognitive Stimulation Therapy (MCST) for people with dementia. *Int J Geriatr Psychiatry* 2005;20(5):446-51
  11. Gillespie LD, Robertson MC, Gillespie WJ, et al. Interventions for preventing falls in older people living in the community. *Cochrane*

- 1  
2  
3  
4  
5  
6  
7  
8  
9  
10  
11  
12  
13  
14  
15  
16  
17  
18  
19  
20  
21  
22  
23  
24  
25  
26  
27  
28  
29  
30  
31  
32  
33  
34  
35  
36  
37  
38  
39  
40  
41  
42  
43  
44  
45  
46  
47  
48  
49  
50  
51  
52  
53  
54  
55  
56  
57  
58  
59  
60
- Database Syst Rev* 2012;(9):CD007146.
12. Yuan S. The mechanisms of Tai Chi Training. *Healthcare Science and education* 2016;45:38
13. American Geriatrics Society. Guideline for the prevention of falls in older persons. *J Am Geriatr Soc* 2001;49:664–72
14. Mortimer JA, Ding D, Borenstein AR, et al. Changes in brain volume and cognition in a randomized trial of exercise and social interaction in a community-based sample of non-demented Chinese elders. *J Alzheimers Dis* 2012;30(4):757-66.
15. Yao L, Giordani B, Alexander NB. Developing a positive emotion-motivated Tai Chi (PEM-TC) exercise program for older adults with dementia. *Res Theory Nurs Pract* 2008;22(4):241-55
16. Klein PJ. Tai Chi Chuan in the management of Parkinson's disease and Alzheimer's disease. *Med Sport Sci* 2008;52:173-81
17. Cheng ST, Chow PK, Song YQ, et al. Mental and Physical Activities Delay Cognitive Decline in Older Persons with Dementia. *Am J Geriatr Psychiatry* 2014;22(1):63-74
18. Tai SY, Hsu CL, Huang SW, et al. Effects of multiple training modalities in patients with Alzheimer's disease: a pilot study. *Neuropsychiatr Dis Treat* 2016; 12:2843-2849
19. Jia J, Wang F, Wei C, et al. The prevalence of dementia in urban and rural areas of China. *Alzheimers Dement* 2014;10(1):1-9

- 1  
2  
3  
4 20. Wang ZY, Zhang MY, Qu GY, et al. Application of Chinese version of  
5  
6 the Mini-Mental State Examination (MMSE). *Shanghai Arch*  
7  
8 *Psychiatry* 1989;7:108-111.  
9
- 10  
11 21. Jihui Lu, Dan Li, Fang Li, et al. Montreal Cognitive Assessment in  
12  
13 Detecting Cognitive Impairment in Chinese Elderly Individuals: A  
14  
15 Population-Based Study. *Journal of Geriatric Psychiatry and*  
16  
17 *Neurology* 2011; 24(4) 184-190  
18
- 19  
20 22. Maj M, Satz P, Janssen R, et al. WHO Neuropsychiatric AIDS study,  
21  
22 cross-sectional phase II. Neuropsychological and neurological  
23  
24 findings. *Arch Gen Psychiatry* 1994;51(1):51-61.  
25  
26
- 27  
28 23. Zhao Q, Guo Q, Li F, et al. The Shape Trail Test: application of a new  
29  
30 variant of the Trail making test. *PLoS One* 2013;8(2):e57333.  
31  
32
- 33 24. C. Lu QHG, Z Hong. Trail making test used by Chinese elderly patients  
34  
35 with mild cognitive impairment and mild Alzheimer dementia.  
36  
37 *Chinese Journal of Clinical Psychology* 2016;14: 118–121.  
38  
39
- 40 25. Yesavage JA, Brink TL, Rose TL, et al. Development and validation of a  
41  
42 geriatric depression screening scale: a preliminary report. *J Psychiatr*  
43  
44 *Res* 1982-83;17(1):37-49  
45  
46
- 47 26. Wang T, Xiao S, Li X, et al. Reliability and validity of the Chinese  
48  
49 version of the neuropsychiatric inventory in mainland China. *Int J*  
50  
51 *Geriatr Psychiatry* 2012;27(5):539-44  
52  
53
- 54  
55 27. Mahoney FI, Barthel DW. Functional evaluation: the Barthel Index.  
56  
57

1  
2  
3  
4  
5  
6  
7  
8  
9  
10  
11  
12  
13  
14  
15  
16  
17  
18  
19  
20  
21  
22  
23  
24  
25  
26  
27  
28  
29  
30  
31  
32  
33  
34  
35  
36  
37  
38  
39  
40  
41  
42  
43  
44  
45  
46  
47  
48  
49  
50  
51  
52  
53  
54  
55  
56  
57  
58  
59  
60

*Md State Med J 1965;14:61-5.*

For peer review only

1  
2  
3  
4 **Figure legends:**  
5

6 **Figure 1 Trail Flow Chart.**  
7

8 **Figure 2 Main movements of the “Cognition Protecting Tai Chi” (CPT).**  
9

10 A1-3: Raising Both Hands  
11

12 B1-3: Forearm Rolling on Both Sides  
13

14 C1-3: Brush Knee and Twist Step on Both sides  
15

16 D1-3: Grasp the Bird's Tail-Left Side and then Right Side, Cloud Hands  
17

18 E1-3: Cloud Hands  
19

20 F1-3: Single Whip  
21

22 G1-3: Work at Shuttles on Both Sides  
23

24 H1-3: Raising Left and then Right Hand  
25  
26  
27  
28  
29  
30  
31  
32  
33  
34  
35  
36  
37  
38  
39  
40  
41  
42  
43  
44  
45  
46  
47  
48  
49  
50  
51  
52  
53  
54  
55  
56  
57  
58  
59  
60



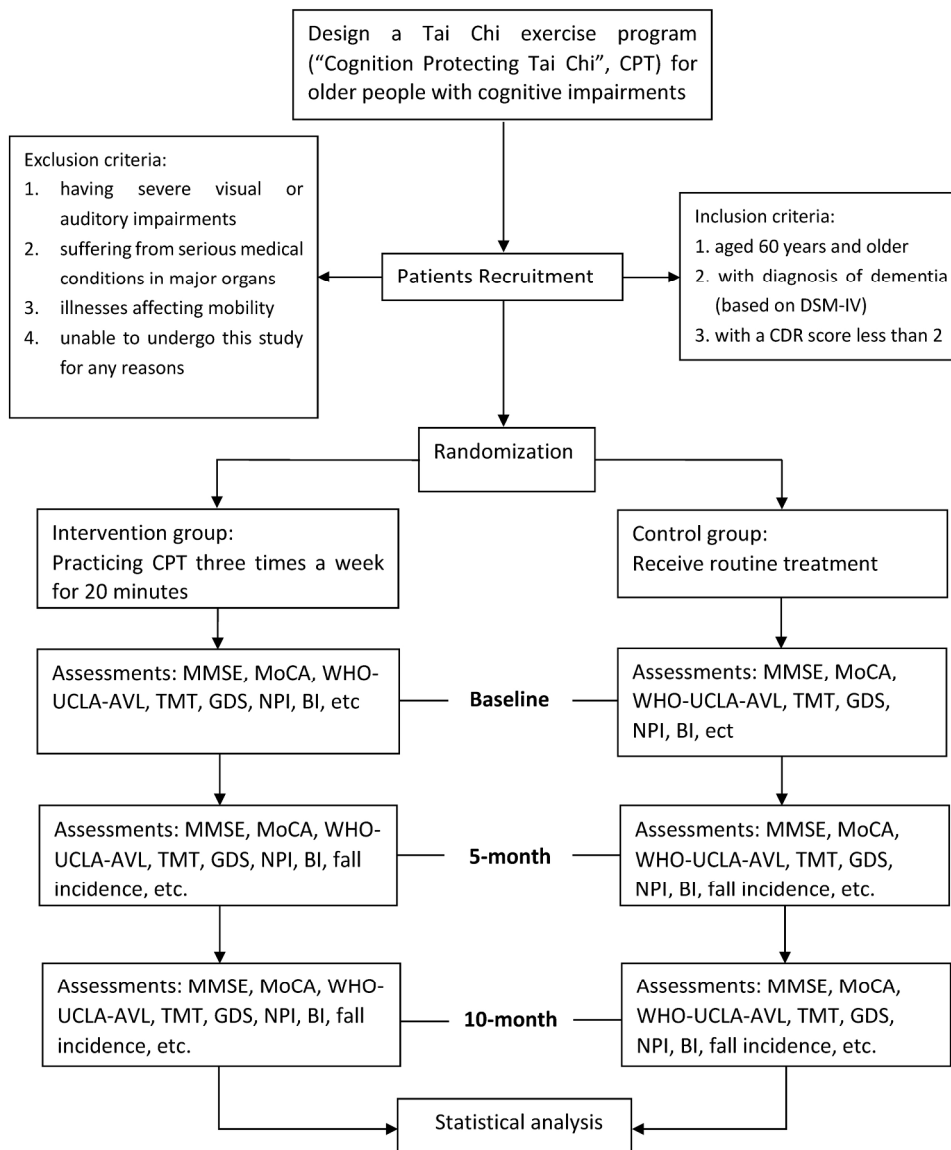

Figure 1 Trail Flow Chart.

221x266mm (300 x 300 DPI)

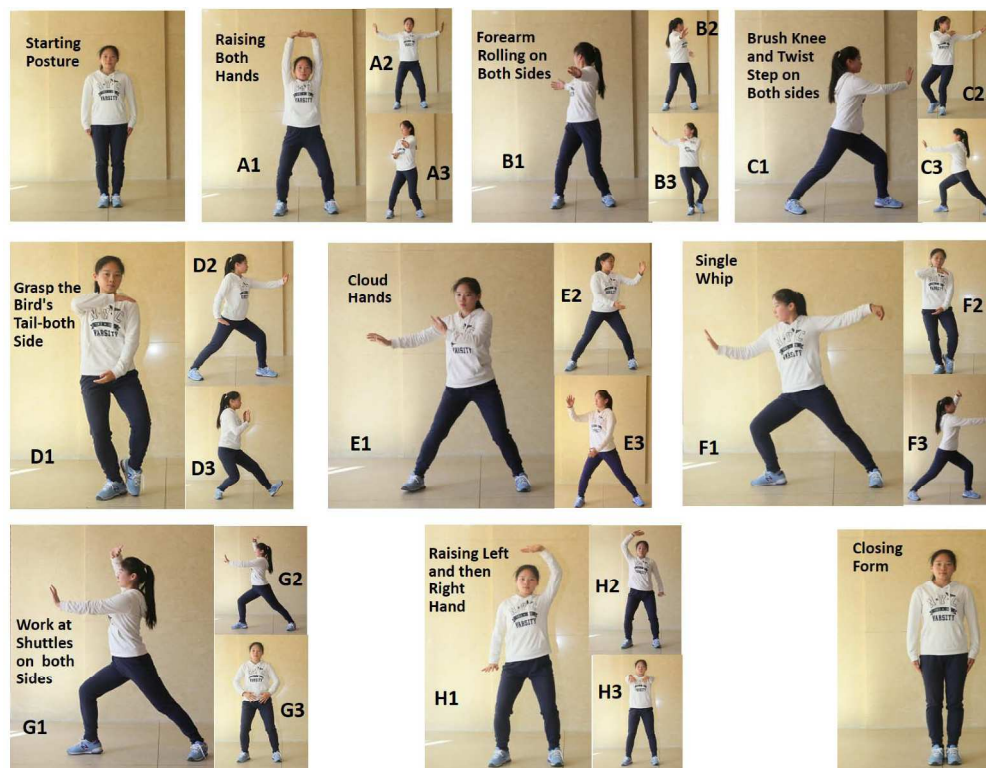

Figure 2 Main movements of the "Cognition Protecting Tai Chi" (CPT).

A1-3: Raising Both Hands

B1-3: Forearm Rolling on Both Sides

C1-3: Brush Knee and Twist Step on Both sides

D1-3: Grasp the Bird's Tail-Left Side and then Right Side, Cloud Hands

E1-3: Cloud Hands

F1-3: Single Whip

G1-3: Work at Shuttles on Both Sides

H1-3: Raising Left and then Right Hand

292x223mm (300 x 300 DPI)

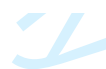

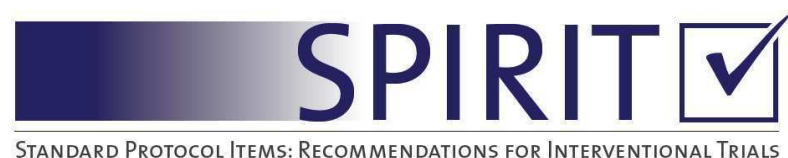


---

 SPIRIT 2013 Checklist: Recommended items to address in a clinical trial protocol and related documents\*
 

---

| Section/item                      | Item No | Description                                                                                                                                                                                                                                                                              | Addressed on page number |
|-----------------------------------|---------|------------------------------------------------------------------------------------------------------------------------------------------------------------------------------------------------------------------------------------------------------------------------------------------|--------------------------|
| <b>Administrative information</b> |         |                                                                                                                                                                                                                                                                                          |                          |
| Title                             | 1       | Descriptive title identifying the study design, population, interventions, and, if applicable, trial acronym                                                                                                                                                                             | 1                        |
| Trial registration                | 2a      | Trial identifier and registry name. If not yet registered, name of intended registry                                                                                                                                                                                                     | 4                        |
|                                   | 2b      | All items from the World Health Organization Trial Registration Data Set                                                                                                                                                                                                                 | NA                       |
| Protocol version                  | 3       | Date and version identifier                                                                                                                                                                                                                                                              | NA                       |
| Funding                           | 4       | Sources and types of financial, material, and other support                                                                                                                                                                                                                              | 19                       |
| Roles and responsibilities        | 5a      | Names, affiliations, and roles of protocol contributors                                                                                                                                                                                                                                  | 18                       |
|                                   | 5b      | Name and contact information for the trial sponsor                                                                                                                                                                                                                                       | 1                        |
|                                   | 5c      | Role of study sponsor and funders, if any, in study design; collection, management, analysis, and interpretation of data; writing of the report; and the decision to submit the report for publication, including whether they will have ultimate authority over any of these activities | NA                       |
|                                   | 5d      | Composition, roles, and responsibilities of the coordinating centre, steering committee, endpoint adjudication committee, data management team, and other individuals or groups overseeing the trial, if applicable (see Item 21a for data monitoring committee)                         | NA                       |

**Introduction**

|    |                                                           |     |                                                                                                                          |                 |
|----|-----------------------------------------------------------|-----|--------------------------------------------------------------------------------------------------------------------------|-----------------|
| 1  |                                                           |     |                                                                                                                          |                 |
| 2  |                                                           |     |                                                                                                                          |                 |
| 3  | Background                                                | 6a  | Description of research question and justification for undertaking the trial, including summary of relevant              | 6-8             |
| 4  | and rationale                                             |     | studies (published and unpublished) examining benefits and harms for each intervention                                   |                 |
| 5  |                                                           |     |                                                                                                                          |                 |
| 6  |                                                           | 6b  | Explanation for choice of comparators                                                                                    | 9               |
| 7  | Objectives                                                | 7   | Specific objectives or hypotheses                                                                                        | 8, 9            |
| 8  |                                                           |     |                                                                                                                          |                 |
| 9  | Trial design                                              | 8   | Description of trial design including type of trial (eg, parallel group, crossover, factorial, single group),            | 10, 11          |
| 10 |                                                           |     | allocation ratio, and framework (eg, superiority, equivalence, noninferiority, exploratory)                              |                 |
| 11 |                                                           |     |                                                                                                                          |                 |
| 12 |                                                           |     |                                                                                                                          |                 |
| 13 | <b>Methods: Participants, interventions, and outcomes</b> |     |                                                                                                                          |                 |
| 14 |                                                           |     |                                                                                                                          |                 |
| 15 | Study setting                                             | 9   | Description of study settings (eg, community clinic, academic hospital) and list of countries where data will be         | 9               |
| 16 |                                                           |     | collected. Reference to where list of study sites can be obtained                                                        |                 |
| 17 |                                                           |     |                                                                                                                          |                 |
| 18 | Eligibility criteria                                      | 10  | Inclusion and exclusion criteria for participants. If applicable, eligibility criteria for study centres and individuals | 11, 12          |
| 19 |                                                           |     | who will perform the interventions (eg, surgeons, psychotherapists)                                                      |                 |
| 20 |                                                           |     |                                                                                                                          |                 |
| 21 | Interventions                                             | 11a | Interventions for each group with sufficient detail to allow replication, including how and when they will be            | 13              |
| 22 |                                                           |     | administered                                                                                                             |                 |
| 23 |                                                           |     |                                                                                                                          |                 |
| 24 |                                                           | 11b | Criteria for discontinuing or modifying allocated interventions for a given trial participant (eg, drug dose             | 13              |
| 25 |                                                           |     | change in response to harms, participant request, or improving/worsening disease)                                        |                 |
| 26 |                                                           |     |                                                                                                                          |                 |
| 27 |                                                           | 11c | Strategies to improve adherence to intervention protocols, and any procedures for monitoring adherence (eg,              | 13              |
| 28 |                                                           |     | drug tablet return, laboratory tests)                                                                                    |                 |
| 29 |                                                           |     |                                                                                                                          |                 |
| 30 |                                                           | 11d | Relevant concomitant care and interventions that are permitted or prohibited during the trial                            | 13              |
| 31 |                                                           |     |                                                                                                                          |                 |
| 32 | Outcomes                                                  | 12  | Primary, secondary, and other outcomes, including the specific measurement variable (eg, systolic blood                  | 16              |
| 33 |                                                           |     | pressure), analysis metric (eg, change from baseline, final value, time to event), method of aggregation (eg,            |                 |
| 34 |                                                           |     | median, proportion), and time point for each outcome. Explanation of the clinical relevance of chosen efficacy           |                 |
| 35 |                                                           |     | and harm outcomes is strongly recommended                                                                                |                 |
| 36 |                                                           |     |                                                                                                                          |                 |
| 37 | Participant                                               | 13  | Time schedule of enrolment, interventions (including any run-ins and washouts), assessments, and visits for              | Figure 1. Trail |
| 38 | timeline                                                  |     | participants. A schematic diagram is highly recommended (see Figure)                                                     | flow chart      |
| 39 |                                                           |     |                                                                                                                          |                 |
| 40 |                                                           |     |                                                                                                                          |                 |
| 41 |                                                           |     |                                                                                                                          |                 |
| 42 |                                                           |     |                                                                                                                          |                 |
| 43 |                                                           |     |                                                                                                                          |                 |
| 44 |                                                           |     |                                                                                                                          |                 |
| 45 |                                                           |     |                                                                                                                          |                 |
| 46 |                                                           |     |                                                                                                                          |                 |
| 47 |                                                           |     |                                                                                                                          |                 |

|    |                                                                     |     |                                                                                                                                                                                                                                                                                                                                                                                                              |       |
|----|---------------------------------------------------------------------|-----|--------------------------------------------------------------------------------------------------------------------------------------------------------------------------------------------------------------------------------------------------------------------------------------------------------------------------------------------------------------------------------------------------------------|-------|
| 1  |                                                                     |     |                                                                                                                                                                                                                                                                                                                                                                                                              |       |
| 2  |                                                                     |     |                                                                                                                                                                                                                                                                                                                                                                                                              |       |
| 3  | Sample size                                                         | 14  | Estimated number of participants needed to achieve study objectives and how it was determined, including clinical and statistical assumptions supporting any sample size calculations                                                                                                                                                                                                                        | 17    |
| 4  |                                                                     |     |                                                                                                                                                                                                                                                                                                                                                                                                              |       |
| 5  | Recruitment                                                         | 15  | Strategies for achieving adequate participant enrolment to reach target sample size                                                                                                                                                                                                                                                                                                                          | 11    |
| 6  |                                                                     |     |                                                                                                                                                                                                                                                                                                                                                                                                              |       |
| 7  |                                                                     |     |                                                                                                                                                                                                                                                                                                                                                                                                              |       |
| 8  | <b>Methods: Assignment of interventions (for controlled trials)</b> |     |                                                                                                                                                                                                                                                                                                                                                                                                              |       |
| 9  |                                                                     |     |                                                                                                                                                                                                                                                                                                                                                                                                              |       |
| 10 | Allocation:                                                         |     |                                                                                                                                                                                                                                                                                                                                                                                                              |       |
| 11 |                                                                     |     |                                                                                                                                                                                                                                                                                                                                                                                                              |       |
| 12 | Sequence generation                                                 | 16a | Method of generating the allocation sequence (eg, computer-generated random numbers), and list of any factors for stratification. To reduce predictability of a random sequence, details of any planned restriction (eg, blocking) should be provided in a separate document that is unavailable to those who enrol participants or assign interventions                                                     | 12    |
| 13 |                                                                     |     |                                                                                                                                                                                                                                                                                                                                                                                                              |       |
| 14 |                                                                     |     |                                                                                                                                                                                                                                                                                                                                                                                                              |       |
| 15 |                                                                     |     |                                                                                                                                                                                                                                                                                                                                                                                                              |       |
| 16 |                                                                     |     |                                                                                                                                                                                                                                                                                                                                                                                                              |       |
| 17 | Allocation concealment mechanism                                    | 16b | Mechanism of implementing the allocation sequence (eg, central telephone; sequentially numbered, opaque, sealed envelopes), describing any steps to conceal the sequence until interventions are assigned                                                                                                                                                                                                    | 12    |
| 18 |                                                                     |     |                                                                                                                                                                                                                                                                                                                                                                                                              |       |
| 19 |                                                                     |     |                                                                                                                                                                                                                                                                                                                                                                                                              |       |
| 20 |                                                                     |     |                                                                                                                                                                                                                                                                                                                                                                                                              |       |
| 21 | Implementation                                                      | 16c | Who will generate the allocation sequence, who will enrol participants, and who will assign participants to interventions                                                                                                                                                                                                                                                                                    | 12    |
| 22 |                                                                     |     |                                                                                                                                                                                                                                                                                                                                                                                                              |       |
| 23 |                                                                     |     |                                                                                                                                                                                                                                                                                                                                                                                                              |       |
| 24 | Blinding (masking)                                                  | 17a | Who will be blinded after assignment to interventions (eg, trial participants, care providers, outcome assessors, data analysts), and how                                                                                                                                                                                                                                                                    | 12    |
| 25 |                                                                     |     |                                                                                                                                                                                                                                                                                                                                                                                                              |       |
| 26 |                                                                     |     |                                                                                                                                                                                                                                                                                                                                                                                                              |       |
| 27 |                                                                     | 17b | If blinded, circumstances under which unblinding is permissible, and procedure for revealing a participant's allocated intervention during the trial                                                                                                                                                                                                                                                         | NA    |
| 28 |                                                                     |     |                                                                                                                                                                                                                                                                                                                                                                                                              |       |
| 29 |                                                                     |     |                                                                                                                                                                                                                                                                                                                                                                                                              |       |
| 30 |                                                                     |     |                                                                                                                                                                                                                                                                                                                                                                                                              |       |
| 31 | <b>Methods: Data collection, management, and analysis</b>           |     |                                                                                                                                                                                                                                                                                                                                                                                                              |       |
| 32 |                                                                     |     |                                                                                                                                                                                                                                                                                                                                                                                                              |       |
| 33 | Data collection methods                                             | 18a | Plans for assessment and collection of outcome, baseline, and other trial data, including any related processes to promote data quality (eg, duplicate measurements, training of assessors) and a description of study instruments (eg, questionnaires, laboratory tests) along with their reliability and validity, if known. Reference to where data collection forms can be found, if not in the protocol | 13-16 |
| 34 |                                                                     |     |                                                                                                                                                                                                                                                                                                                                                                                                              |       |
| 35 |                                                                     |     |                                                                                                                                                                                                                                                                                                                                                                                                              |       |
| 36 |                                                                     |     |                                                                                                                                                                                                                                                                                                                                                                                                              |       |
| 37 |                                                                     |     |                                                                                                                                                                                                                                                                                                                                                                                                              |       |
| 38 |                                                                     | 18b | Plans to promote participant retention and complete follow-up, including list of any outcome data to be collected for participants who discontinue or deviate from intervention protocols                                                                                                                                                                                                                    | 13    |
| 39 |                                                                     |     |                                                                                                                                                                                                                                                                                                                                                                                                              |       |
| 40 |                                                                     |     |                                                                                                                                                                                                                                                                                                                                                                                                              |       |
| 41 |                                                                     |     |                                                                                                                                                                                                                                                                                                                                                                                                              |       |
| 42 |                                                                     |     |                                                                                                                                                                                                                                                                                                                                                                                                              |       |
| 43 |                                                                     |     |                                                                                                                                                                                                                                                                                                                                                                                                              |       |
| 44 |                                                                     |     |                                                                                                                                                                                                                                                                                                                                                                                                              |       |
| 45 |                                                                     |     |                                                                                                                                                                                                                                                                                                                                                                                                              |       |
| 46 |                                                                     |     |                                                                                                                                                                                                                                                                                                                                                                                                              |       |
| 47 |                                                                     |     |                                                                                                                                                                                                                                                                                                                                                                                                              |       |

|    |                                 |     |                                                                                                                  |        |
|----|---------------------------------|-----|------------------------------------------------------------------------------------------------------------------|--------|
| 1  |                                 |     |                                                                                                                  |        |
| 2  |                                 |     |                                                                                                                  |        |
| 3  | Data                            | 19  | Plans for data entry, coding, security, and storage, including any related processes to promote data quality     | 17     |
| 4  | management                      |     | (eg, double data entry; range checks for data values). Reference to where details of data management             |        |
| 5  |                                 |     | procedures can be found, if not in the protocol                                                                  |        |
| 6  |                                 |     |                                                                                                                  |        |
| 7  | Statistical                     | 20a | Statistical methods for analysing primary and secondary outcomes. Reference to where other details of the        | 17, 18 |
| 8  | methods                         |     | statistical analysis plan can be found, if not in the protocol                                                   |        |
| 9  |                                 |     |                                                                                                                  |        |
| 10 |                                 | 20b | Methods for any additional analyses (eg, subgroup and adjusted analyses)                                         | NA     |
| 11 |                                 |     |                                                                                                                  |        |
| 12 |                                 | 20c | Definition of analysis population relating to protocol non-adherence (eg, as randomised analysis), and any       | NA     |
| 13 |                                 |     | statistical methods to handle missing data (eg, multiple imputation)                                             |        |
| 14 |                                 |     |                                                                                                                  |        |
| 15 | <b>Methods: Monitoring</b>      |     |                                                                                                                  |        |
| 16 |                                 |     |                                                                                                                  |        |
| 17 | Data monitoring                 | 21a | Composition of data monitoring committee (DMC); summary of its role and reporting structure; statement of        | NA     |
| 18 |                                 |     | whether it is independent from the sponsor and competing interests; and reference to where further details       |        |
| 19 |                                 |     | about its charter can be found, if not in the protocol. Alternatively, an explanation of why a DMC is not needed |        |
| 20 |                                 |     |                                                                                                                  |        |
| 21 |                                 | 21b | Description of any interim analyses and stopping guidelines, including who will have access to these interim     | NA     |
| 22 |                                 |     | results and make the final decision to terminate the trial                                                       |        |
| 23 |                                 |     |                                                                                                                  |        |
| 24 | Harms                           | 22  | Plans for collecting, assessing, reporting, and managing solicited and spontaneously reported adverse events     | 16     |
| 25 |                                 |     | and other unintended effects of trial interventions or trial conduct                                             |        |
| 26 |                                 |     |                                                                                                                  |        |
| 27 | Auditing                        | 23  | Frequency and procedures for auditing trial conduct, if any, and whether the process will be independent from    | NA     |
| 28 |                                 |     | investigators and the sponsor                                                                                    |        |
| 29 |                                 |     |                                                                                                                  |        |
| 30 |                                 |     |                                                                                                                  |        |
| 31 | <b>Ethics and dissemination</b> |     |                                                                                                                  |        |
| 32 |                                 |     |                                                                                                                  |        |
| 33 | Research ethics                 | 24  | Plans for seeking research ethics committee/institutional review board (REC/IRB) approval                        | 4, 19  |
| 34 | approval                        |     |                                                                                                                  |        |
| 35 |                                 |     |                                                                                                                  |        |
| 36 | Protocol                        | 25  | Plans for communicating important protocol modifications (eg, changes to eligibility criteria, outcomes,         | NA     |
| 37 | amendments                      |     | analyses) to relevant parties (eg, investigators, REC/IRBs, trial participants, trial registries, journals,      |        |
| 38 |                                 |     | regulators)                                                                                                      |        |
| 39 |                                 |     |                                                                                                                  |        |
| 40 |                                 |     |                                                                                                                  |        |
| 41 |                                 |     |                                                                                                                  |        |
| 42 |                                 |     |                                                                                                                  |        |
| 43 |                                 |     |                                                                                                                  |        |
| 44 |                                 |     |                                                                                                                  |        |
| 45 |                                 |     |                                                                                                                  |        |
| 46 |                                 |     |                                                                                                                  |        |
| 47 |                                 |     |                                                                                                                  |        |

|    |                   |     |                                                                                                                   |    |
|----|-------------------|-----|-------------------------------------------------------------------------------------------------------------------|----|
| 1  |                   |     |                                                                                                                   |    |
| 2  |                   |     |                                                                                                                   |    |
| 3  | Consent or        | 26a | Who will obtain informed consent or assent from potential trial participants or authorised surrogates, and how    | 4  |
| 4  | assent            |     | (see Item 32)                                                                                                     |    |
| 5  |                   |     |                                                                                                                   |    |
| 6  |                   | 26b | Additional consent provisions for collection and use of participant data and biological specimens in ancillary    | NA |
| 7  |                   |     | studies, if applicable                                                                                            |    |
| 8  |                   |     |                                                                                                                   |    |
| 9  | Confidentiality   | 27  | How personal information about potential and enrolled participants will be collected, shared, and maintained in   | 17 |
| 10 |                   |     | order to protect confidentiality before, during, and after the trial                                              |    |
| 11 |                   |     |                                                                                                                   |    |
| 12 | Declaration of    | 28  | Financial and other competing interests for principal investigators for the overall trial and each study site     | 19 |
| 13 | interests         |     |                                                                                                                   |    |
| 14 |                   |     |                                                                                                                   |    |
| 15 | Access to data    | 29  | Statement of who will have access to the final trial dataset, and disclosure of contractual agreements that limit | NA |
| 16 |                   |     | such access for investigators                                                                                     |    |
| 17 |                   |     |                                                                                                                   |    |
| 18 | Ancillary and     | 30  | Provisions, if any, for ancillary and post-trial care, and for compensation to those who suffer harm from trial   | NA |
| 19 | post-trial care   |     | participation                                                                                                     |    |
| 20 |                   |     |                                                                                                                   |    |
| 21 | Dissemination     | 31a | Plans for investigators and sponsor to communicate trial results to participants, healthcare professionals, the   | 4  |
| 22 | policy            |     | public, and other relevant groups (eg, via publication, reporting in results databases, or other data sharing     |    |
| 23 |                   |     | arrangements), including any publication restrictions                                                             |    |
| 24 |                   |     |                                                                                                                   |    |
| 25 |                   | 31b | Authorship eligibility guidelines and any intended use of professional writers                                    | NA |
| 26 |                   |     |                                                                                                                   |    |
| 27 |                   | 31c | Plans, if any, for granting public access to the full protocol, participant-level dataset, and statistical code   | NA |
| 28 |                   |     |                                                                                                                   |    |
| 29 | <b>Appendices</b> |     |                                                                                                                   |    |
| 30 |                   |     |                                                                                                                   |    |
| 31 | Informed          | 32  | Model consent form and other related documentation given to participants and authorised surrogates                | NA |
| 32 | consent           |     |                                                                                                                   |    |
| 33 | materials         |     |                                                                                                                   |    |
| 34 |                   |     |                                                                                                                   |    |
| 35 | Biological        | 33  | Plans for collection, laboratory evaluation, and storage of biological specimens for genetic or molecular         | NA |
| 36 | specimens         |     | analysis in the current trial and for future use in ancillary studies, if applicable                              |    |
| 37 |                   |     |                                                                                                                   |    |
| 38 |                   |     |                                                                                                                   |    |
| 39 |                   |     |                                                                                                                   |    |
| 40 |                   |     |                                                                                                                   |    |
| 41 |                   |     |                                                                                                                   |    |
| 42 |                   |     |                                                                                                                   |    |
| 43 |                   |     |                                                                                                                   |    |
| 44 |                   |     |                                                                                                                   |    |
| 45 |                   |     |                                                                                                                   |    |
| 46 |                   |     |                                                                                                                   |    |
| 47 |                   |     |                                                                                                                   |    |

1  
2 \*It is strongly recommended that this checklist be read in conjunction with the SPIRIT 2013 Explanation & Elaboration for important clarification on the items.  
3 Amendments to the protocol should be tracked and dated. The SPIRIT checklist is copyrighted by the SPIRIT Group under the Creative Commons  
4 "[Attribution-NonCommercial-NoDerivs 3.0 Unported](#)" license.  
5  
6  
7  
8  
9  
10  
11  
12  
13  
14  
15  
16  
17  
18  
19  
20  
21  
22  
23  
24  
25  
26  
27  
28  
29  
30  
31  
32  
33  
34  
35  
36  
37  
38  
39  
40  
41  
42  
43  
44  
45  
46  
47

For peer review only



# BMJ Open

## The Efficacy of Practicing Tai Chi for Older People with Mild Dementia: Protocol for a Randomized Controlled Study

|                                 |                                                                                                                                                                                                                                                                                                                                                                                                                                                                                                                                                                                                                                                                                                                                                                                                                                                                                                                                                                                                                                                                                    |
|---------------------------------|------------------------------------------------------------------------------------------------------------------------------------------------------------------------------------------------------------------------------------------------------------------------------------------------------------------------------------------------------------------------------------------------------------------------------------------------------------------------------------------------------------------------------------------------------------------------------------------------------------------------------------------------------------------------------------------------------------------------------------------------------------------------------------------------------------------------------------------------------------------------------------------------------------------------------------------------------------------------------------------------------------------------------------------------------------------------------------|
| Journal:                        | <i>BMJ Open</i>                                                                                                                                                                                                                                                                                                                                                                                                                                                                                                                                                                                                                                                                                                                                                                                                                                                                                                                                                                                                                                                                    |
| Manuscript ID                   | bmjopen-2017-019940.R2                                                                                                                                                                                                                                                                                                                                                                                                                                                                                                                                                                                                                                                                                                                                                                                                                                                                                                                                                                                                                                                             |
| Article Type:                   | Protocol                                                                                                                                                                                                                                                                                                                                                                                                                                                                                                                                                                                                                                                                                                                                                                                                                                                                                                                                                                                                                                                                           |
| Date Submitted by the Author:   | 06-Apr-2018                                                                                                                                                                                                                                                                                                                                                                                                                                                                                                                                                                                                                                                                                                                                                                                                                                                                                                                                                                                                                                                                        |
| Complete List of Authors:       | Lyu, Jihui; Beijing Geriatric Hospital, Center for Cognitive Disorders; Capital Medical University, Alzheimer's disease Center, Beijing Institute for Brain Disorders<br>Li, Wenjie; Beijing Geriatric Hospital, Center for Cognitive Disorders<br>Rong, Xiangjiang; Capital University of Physical Education and Sport, School of Kinesiology and Health<br>Wei, Lian ; Capital University of Physical Education and Sport, Graduate School<br>Huang, Nayan; Beijing Geriatric Hospital, Center for Cognitive Disorders; Capital Medical University, Alzheimer's disease Center, Beijing Institute for Brain Disorders<br>Champ, Mei; University of the West of England, Department of Nursing and Midwifery<br>Xiong, Qian; Lancaster University, Centre for Ageing Research, Division of Health Research, Faculty of Health and Medicine<br>Chen, Xueli; Beijing Geriatric Hospital, Department of Rehabilitation<br>Li, Mo; Beijing Geriatric Hospital, Center for Cognitive Disorders<br>Li, Fangling; Beijing Geriatric Hospital, Department of Traditional Chinese Medicine |
| <b>Primary Subject Heading</b>: | Geriatric medicine                                                                                                                                                                                                                                                                                                                                                                                                                                                                                                                                                                                                                                                                                                                                                                                                                                                                                                                                                                                                                                                                 |
| Secondary Subject Heading:      | Neurology, Rehabilitation medicine                                                                                                                                                                                                                                                                                                                                                                                                                                                                                                                                                                                                                                                                                                                                                                                                                                                                                                                                                                                                                                                 |
| Keywords:                       | Tai Chi, cognitive function, Dementia < NEUROLOGY                                                                                                                                                                                                                                                                                                                                                                                                                                                                                                                                                                                                                                                                                                                                                                                                                                                                                                                                                                                                                                  |
|                                 |                                                                                                                                                                                                                                                                                                                                                                                                                                                                                                                                                                                                                                                                                                                                                                                                                                                                                                                                                                                                                                                                                    |

SCHOLARONE™  
Manuscripts

# The Efficacy of Practicing Tai Chi for Older People with Mild Dementia: Protocol for a Randomized Controlled Study

Jihui Lyu<sup>1,2†\*</sup>, Wenjie Li<sup>1†</sup>, Xiangjiang Rong<sup>3†</sup>, Lian Wei<sup>4</sup>, Nayan Huang<sup>1,2</sup>,  
Mei Champ<sup>5</sup>, Qian Xiong<sup>6</sup>, Xueli Chen<sup>7</sup>, Mo Li<sup>1</sup>, Fangling Li<sup>8</sup>

<sup>1</sup>Center for Cognitive Disorders, Beijing Geriatric Hospital, Beijing 100095, China

<sup>2</sup>Alzheimer's disease Center, Beijing Institute for Brain Disorders, Capital Medical  
University, Beijing 100069, China

<sup>3</sup>School of Kinesiology and Health, Capital University of Physical Education and Sport,  
Beijing 100191, China

<sup>4</sup>Graduate School, Capital University of Physical Education and Sport, Beijing 100191,  
China

<sup>5</sup>Department of Nursing and Midwifery, University of the West of England, United  
Kingdom

<sup>6</sup>Centre for Ageing Research, Division of Health Research, Faculty of Health and  
Medicine, Lancaster University, United Kingdom

<sup>7</sup>Department of Rehabilitation, Beijing Geriatric Hospital, Beijing 100095, China

<sup>8</sup>Department of Traditional Chinese Medicine, Beijing Geriatric Hospital, Beijing  
100095, China

† These authors contributed equally to this work.

**Correspondence to:** Dr Jihui Lyu, Email: lvjihui@139.com

**Key words:** dementia, Tai Chi, cognitive function

**Word count: 3033**

For peer review only

1  
2  
3  
4  
5  
6  
7  
8  
9  
10  
11  
12  
13  
14  
15  
16  
17  
18  
19  
20  
21  
22  
23  
24  
25  
26  
27  
28  
29  
30  
31  
32  
33  
34  
35  
36  
37  
38  
39  
40  
41  
42  
43  
44  
45  
46  
47  
48  
49  
50  
51  
52  
53  
54  
55  
56  
57  
58  
59  
60

## ABSTRACT

### Introduction

Many studies suggest that Tai Chi exercise is a safe and appropriate mind-body exercise for older people and effectively slows down age-related cognitive decline. A set of bespoke Tai Chi exercise named “Cognition Protecting Tai Chi” (CPT) has been created for older people with cognitive impairments by the research team of geriatricians, neurologists, rehabilitation specialists, experts of sports medicine, and experienced practitioners of traditional Chinese medicine. This trial is designed to evaluate its effects on cognitive function, behavior/moods, risk of falls and activities of daily living of the participants with mild dementia.

### Methods and analysis

A randomized controlled study will be conducted. Eighty participants with mild dementia will be recruited and randomly allocated to an intervention group and a control group. The intervention group will practice the CPT three times a week for 20 minutes each time under the guidance of professional therapists. The control group will continue receiving their routine treatments. The duration of this study will be 10 months. All participants will be assessed with a battery of neuropsychological and functional evaluations, which include Mini-Mental State Examination, Montreal Cognitive Assessment, the

1  
2  
3 World Health Organization–University of California Los Angeles Auditory  
4  
5 Verbal Learning test (WHO-UCLA-AVLT), Trail Making Test (TMT),  
6  
7  
8 Geriatric Depression Scale, Neuropsychological Inventory and Barthel  
9  
10 Index, at the baseline, five and ten months during the study period. Fall  
11  
12 incident will also be recorded. The primary outcome will be the  
13  
14 WHO-UCLA-AVLT delayed recall score. The secondary outcome will be  
15  
16 the TMT score.  
17  
18  
19

### 20 **Ethics and dissemination**

21  
22 This study has been approved by the ethical review committee of the  
23  
24 Beijing Geriatric Hospital (protocol number: 2015-021). Informed  
25  
26 consent will be obtained from all participants or their guardians. The  
27  
28 authors intend to submit the findings of the study to peer-reviewed  
29  
30 journals or academic conferences to be published.  
31  
32  
33  
34

### 35 **Trial registration number**

36  
37 ChiCTR-INR-16009872 (<http://www.chictr.org.cn>)  
38  
39  
40  
41  
42  
43  
44  
45  
46  
47  
48  
49  
50  
51  
52  
53  
54  
55  
56  
57  
58  
59  
60

### Strengths and limitations of this study

- ▶ The bespoke CPT is specially designed for older people with mild dementia by the research team of multidisciplinary professionals
- ▶ The randomized controlled trial design minimizes the risk of selection bias.
- ▶ As the sample size is calculated based on the primary outcome, this study may fail to demonstrate statistical differences of secondary outcomes.
- ▶ An open-label study design is often viewed as leaning towards bias, however it is not feasible to achieve a blinded intervention for this study.

## INTRODUCTION

There are various clinical symptoms of people with dementia, which usually start with cognitive impairments, such as memory loss, and then complaints of inattention, miscalculation, lack of logical reasoning and disorientation<sup>1</sup>. Besides cognitive impairments, people with dementia may also experience some changes psychologically and physically. There might be changes in personality, mood swings, ability to communicate and behaviors. It is often observed that patients with dementia feel anxious, depressed and may become verbally and physically aggressive. As the disease progresses, these symptoms gradually affect their ability in maintaining their activities of daily living, which leads to loss of independence. Current pharmacologic interventions used to maintain cognitive function, such as acetylcholinesterase inhibitors and memantine, have limited efficacy, and there are usually side effects<sup>2-5</sup>. Meanwhile, typical and atypical antipsychotics for dementia have the same or even severe side effects.

According to neuroplasticity theory, the repetition of stimulate-reflect training can help patients with dementia in preservation and restoration of brain functions, even when the brain has pathological damage to some extent<sup>6</sup>. There has been a considerable focus on the non-pharmacological approach to enhancing cognition. Many studies suggest that mind-body exercise can efficiently prevent the onset of

1  
2  
3 dementia by delaying age-related cognitive decline, and benefit the  
4  
5 prognosis of dementia<sup>7-10</sup>.  
6  
7

8 As one of traditional Chinese martial arts, Tai Chi is an aerobic  
9  
10 mind-body exercise with mild-to-moderate physical movements that are  
11  
12 safe for older people<sup>11</sup>. Tai Chi requires mind concentration and shifting  
13  
14 the balance of body in accordance with gentle and smooth movements  
15  
16 and steady breathing. In the theory of traditional Chinese medicine, Qi  
17  
18 (Qi is one of the fixed technical terms in traditional Chinese medicine,  
19  
20 referring to behavioral patterns seen to occur through the spatial  
21  
22 extension of a physical medium, which is both activity and active  
23  
24 substance) and blood are the two most fundamental materials to  
25  
26 maintain human life activities. Qi and blood can both be mobilized  
27  
28 coordinately when practicing Tai Chi, which helps maintain the balance  
29  
30 of Yin and Yang (the two opposite properties of all natural things in  
31  
32 traditional Chinese medicine) and improves harmony of human body<sup>12</sup>.  
33  
34 As the nature of Tai Chi exercise strengthens the muscles of lower limbs  
35  
36 of the body, it helps improve stability and minimize the risk of falls<sup>11</sup>. Tai  
37  
38 Chi is a recommended exercise for fall prevention in older people by the  
39  
40 American Geriatrics Society, because it not only improves muscular  
41  
42 strength, co-ordination and balance, but also is an enjoyable activity  
43  
44 with a potential as a long-term exercise regime<sup>13</sup>. A randomized trial in  
45  
46 older Chinese people without dementia carried out by Mortimer, et al in  
47  
48  
49  
50  
51  
52  
53  
54  
55  
56  
57  
58  
59  
60



1  
2  
3  
4 2012 suggest that Tai Chi increases brain volume and improves cognitive  
5  
6 function more effectively than the intervention of social interaction<sup>14</sup>.  
7  
8 Evidence has also shown that Tai Chi is an appropriate exercise for  
9  
10 individuals with dementia in early stages, which helps improve quality of  
11  
12 life, brain function inducing reconstruction of neurons, and Tai Chi could  
13  
14 become an emerging alternative therapy for people with dementia<sup>15-17</sup>.  
15  
16 Other studies reported that physical exercise like Tai Chi improved mood  
17  
18 and alleviated psychiatric problems in early or middle stages of dementia  
19  
20 and also significantly reduced caregiver distresses<sup>18</sup>. For example, Sticky  
21  
22 Hands Tai Chi, a special Tai Chi training technique practiced with a  
23  
24 partner, promoted a comforting intimate interaction between the two  
25  
26 persons and improved exercise adherence and mood in older people  
27  
28 with dementia<sup>15</sup>.  
29  
30  
31  
32  
33  
34

35 China has the largest number of older people with dementia<sup>19</sup> and Tai  
36  
37 Chi is originated from China. Tai Chi experts in China have developed  
38  
39 various programs of Tai Chi, but none is especially designed for older  
40  
41 people with cognitive impairments. Therefore, a set of Tai Chi program  
42  
43 named "Cognition Protecting Tai Chi" (CPT) has been designed by the  
44  
45 research team of multidisciplinary professionals in the first stage of this  
46  
47 study. The second stage of this study is to test the effectiveness of the  
48  
49 CPT program in improving cognitive function, and to evaluate its effects  
50  
51 and impacts on psychological behavior, mood swings, risk of falls and  
52  
53  
54  
55  
56  
57  
58  
59  
60

1  
2  
3 ability in maintaining activities of daily living for people with mild  
4 dementia with comparison to usual care. If results are positive, it would  
5 demonstrate the potential to become a routine cost-effective exercise  
6 for older people with mild dementia.  
7  
8  
9  
10  
11  
12  
13  
14

## 15 **METHODS**

16  
17  
18 **Settings:** This study is designed at Center for Cognitive Disorders of  
19 Beijing Geriatric Hospital (BGH). The Case Report Forms will be kept and  
20 research data will be analyzed by BGH. This hospital is a tertiary hospital  
21 which is the highest rank in China's hospital system in terms of capacity  
22 of beds and research capability. BGH has 900 inpatient beds and is  
23 located in Haidian District of Beijing. The Center for Cognitive Disorders  
24 of BGH is a department serving older people with cognitive impairments.  
25 It is also the Guidance Center for Cognitive Rehabilitation of Haidian  
26 District. The recruitment, assessment, intervention, and follow-ups of  
27 participants will be conducted at three long-term care facilities near BGH  
28 at where the participants reside.  
29  
30  
31  
32  
33  
34  
35  
36  
37  
38  
39  
40  
41  
42  
43

### 44 **Study design**

45  
46  
47 There are two stages in this study design (Figure 1).  
48  
49

50 The first stage is the development of the CPT program by the research  
51 team. The CPT program was specifically designed for cognitively  
52 impaired patients by a research team of geriatricians, neurologists,  
53  
54  
55  
56  
57  
58  
59  
60

1  
2  
3  
4 rehabilitation specialists, experts of sports medicine, and experienced  
5  
6 practitioners of traditional Chinese medicine in 2016. The team has  
7  
8 modified the traditional Chinese Tai Chi to suit people with mild  
9  
10 dementia. Any unsafe and complex actions in the traditional eight style  
11  
12 Tai Chi program was removed, and some movements which were  
13  
14 thought to be more beneficial for cognitive functions were added based  
15  
16 on theories of traditional Chinese medical science. For example, the  
17  
18 researchers removed the posture of standing on one foot and added  
19  
20 some movements of rotating wrists and fingers in consideration of the  
21  
22 suitability and safety aspects of the program for people with dementia.  
23  
24 The CPT program contains eight styles of Tai Chi movements and each  
25  
26 movement can be divided into three different maneuvers. Between  
27  
28 January 2017 and May 2017, the CPT has been performed in five patients  
29  
30 with mild dementia who were invited to learn and practice the CPT  
31  
32 program for four weeks. The CPT has been further modified where  
33  
34 necessary based on the comments and the feedback provided by the  
35  
36 participants before the completion of final version of the CPT.  
37  
38  
39  
40  
41  
42  
43  
44

45 In addition to routine Starting Posture and Closing Form, there are  
46  
47 eight styles of Tai Chi movements in the CPT, including Raising Both  
48  
49 Hands, Forearm Rolling on Both Sides, Brush Knee and Twist Step on  
50  
51 Both sides, Grasp the Bird's Tail-Left Side and then Right Side,  
52  
53 Cloud Hands, Single Whip, Work at Shuttles on Both Sides, and Raising  
54  
55  
56  
57

1  
2  
3  
4 Left and then Right Hand (Figure 2).  
5

6 The second stage is a randomized controlled trial which will be  
7  
8 conducted to test the effectiveness of the CPT program.  
9

### 10 **Recruitment of participants**

11  
12 Participants will be recruited from long-term care facilities near BGH.  
13  
14 These facilities are Wenquan nursing home, Lengquan nursing home,  
15  
16 and Hexihui nursing home. There are altogether more than one  
17  
18 thousand older residents living in these nursing homes, thus sufficient  
19  
20 samples can be provided. Residents who meet the inclusion criteria will  
21  
22 be recruited.  
23  
24  
25  
26  
27

### 28 **Inclusion criteria**

29  
30 Residents aged 60 years or older with mild dementia (diagnosis is based  
31  
32 on The Diagnostic and Statistical Manual of Mental Disorders, 4th  
33  
34 edition), who have a Clinical Dementia Rating score less than 2 will be  
35  
36 enrolled into this study.  
37  
38  
39

### 40 **Exclusion criteria**

41  
42 Residents who have severe visual or auditory impairment, serious  
43  
44 medical conditions in major organs (such as heart, lung, kidney, liver and  
45  
46 so on), illnesses affecting mobility, or are unable to accept assessments  
47  
48 or interventions which are required in this study for any reasons.  
49  
50  
51

### 52 **Randomization and allocation sequence**

53  
54 Participants will be enrolled by dementia specialists. The  
55  
56

1  
2  
3 randomization will be carried out by an independent research assistant  
4  
5 who will not be involved in the enrollment, assessment, or intervention  
6  
7 of the participants. Random number sequences will be generated using  
8  
9 SAS software. Sealed envelopes with the serial number outside and  
10  
11 group number inside will be produced and kept in a locked drawer which  
12  
13 will be inaccessible to all the researchers. The envelopes will be opened  
14  
15 sequentially by the independent research assistant after baseline  
16  
17 assessments and participants will be assigned to two groups (i.e. one  
18  
19 intervention group and one control group) at a ratio of 1:1 according to  
20  
21 the group number printed inside the envelopes. Outcome evaluators and  
22  
23 data analysts will be blinded to the group assignment.  
24  
25  
26  
27  
28  
29

### 30 **Intervention**

31  
32 This study is designed as a 10 month-randomized controlled trial. In  
33  
34 addition to their routine treatment and usual care for ADL, the  
35  
36 intervention group will perform the CPT exercise three times a week for  
37  
38 20 minutes each time under the guidance of the professional therapists  
39  
40 at where the participants reside. The intervention will be practiced in  
41  
42 groups with one therapist to five to eight participants. The control group  
43  
44 will only receive routine treatments and usual care for ADL. The  
45  
46 intervention to the participant should be discontinued if any  
47  
48 complication that could affect the outcomes of the CPT occurs. The  
49  
50 participants will be encouraged to complete follow-ups. The participants  
51  
52  
53  
54  
55  
56  
57  
58  
59  
60

1  
2  
3  
4 and their representatives have access to the research team anytime if  
5  
6 they need to discuss any issues or concerns during the study period. The  
7  
8 participants will be explained that they can discontinue with the  
9  
10 intervention at any time during the period of the study. Demographic  
11  
12 information of participants who withdraw from the study after  
13  
14 randomization and the reasons for their withdrawal will be collected.  
15  
16

### 17 **Assessment**

18  
19 The trial will utilize the most commonly used tools (see below) that have  
20  
21 been carefully selected to assess the efficacy of CPT. The Chinese version  
22  
23 of Mini Mental State Examination (MMSE)<sup>20</sup> is a 30-point questionnaire  
24  
25 which is used to measure cognitive impairments. It examines functions  
26  
27 of attention, calculation, recall, language, ability to follow simple  
28  
29 commands and orientation.  
30  
31  
32  
33

34  
35 The Montreal Cognitive Assessment (MoCA) Beijing version  
36  
37 (www.mocatest.org) is also a 30-point test for assessing cognitive  
38  
39 function. MoCA includes cognitive domains for short-term memory recall,  
40  
41 visuospatial abilities, multiple aspects of executive functions, attention,  
42  
43 concentration and working memory, language and orientation to time  
44  
45 and place. Because there are more difficult and multiple tasks in MoCA,  
46  
47 MoCA is more sensitive to detect mild cognitive changes than MMSE  
48  
49 does<sup>21</sup>.  
50  
51  
52  
53

54  
55 The World Health Organization–University of California Los Angeles  
56  
57

1  
2  
3 Auditory Verbal Learning test (WHO-UCLA-AVL)<sup>22</sup> is a tool to assess  
4 immediate recall and delayed recall with 15 words independent in  
5 meaning. Immediate recall is performed by asking the participants to  
6 remember and recall those 15 words just after each auditory learning,  
7 and this learning-recall process is repeated for three times to generate  
8 an average performance score. An average performance is recorded.  
9  
10 Delayed recall is performed by asking the participants to recall those 15  
11 words 30-45 minutes after the immediate recall has been completed.  
12  
13  
14  
15  
16  
17  
18  
19  
20  
21  
22

23 The study utilizes the method of the Trail Making Test (TMT) which is a  
24 neuropsychological test of visual attention and task switching. It can  
25 provide information on visual search speed, scanning, speed of  
26 processing, mental flexibility, as well as executive functioning. A Chinese  
27 version of Shape TMT was used in this study. This Shape TMT shows  
28 numbers from 1 to 25 twice, once in a circle and once in a square. The  
29 participants are asked to connect them in sequential order alternately  
30 between circles and squares (circle 1, square 1, circle 2, square 2, etc.)<sup>23</sup>.  
31  
32 This Shape TMT has been proved to be a sensitive test of visual search  
33 and sequencing<sup>24</sup>.  
34  
35  
36  
37  
38  
39  
40  
41  
42  
43  
44  
45  
46

47 The Geriatric Depression Scale (GDS)<sup>25</sup> is a 30-item self-report  
48 assessment used to identify depression in the elderly, of which questions  
49 are answered in a "yes" or "no" format. It is appropriate to test older  
50 individuals with mild or moderate cognitive impairment using GDS.  
51  
52  
53  
54  
55  
56  
57  
58  
59  
60

1  
2  
3 The Neuropsychiatric Inventory (NPI)<sup>26</sup> assesses common psychiatric  
4 and behavioral symptoms in dementia. Its items include hallucinations,  
5  
6 and behavioral symptoms in dementia. Its items include hallucinations,  
7  
8 delusions, agitation/aggression, dysphoria/depression, anxiety,  
9  
10 irritability, disinhibition, euphoria, apathy, aberrant motor behavior,  
11  
12 sleep and night-time behavior disturbance, appetite and eating disorders.  
13  
14 Information can be obtained from caregivers who have in-depth  
15  
16 knowledge of the patients' performance. The caregivers will also be  
17  
18 asked to rate their own distress level associated with daily care and  
19  
20 support provided by them to the patients.  
21  
22  
23  
24

25 The Barthel Index (BI)<sup>27</sup> is an ordinal scale used to measure  
26  
27 performance in ADL. The ten variables describing ADL and mobility  
28  
29 addressed in the Barthel scale are: presence or absence of fecal  
30  
31 incontinence, urinary incontinence, grooming, toileting, feeding,  
32  
33 transferring (e.g. from chair to bed), walking, dressing, climbing stairs  
34  
35 and bathing. The scoring is based on information provided by the  
36  
37 participant's informant, who can be his/her family members or  
38  
39 caregivers.  
40  
41  
42  
43  
44

45 All participants will undergo all above assessments at 0 (baseline), five  
46  
47 and ten months within the current study period. Fall incident will also be  
48  
49 recorded. Fall will be defined as the experience of a sudden, involuntary,  
50  
51 unintentional change of position, down on the ground or on a lower  
52  
53 plane. When assessing a definite fall, the team will try to get an  
54  
55  
56  
57  
58  
59  
60



1  
2  
3  
4 eyewitness account or records of security cameras (all the areas of the  
5  
6 nursing homes where participants live will be monitored by 24-hour  
7  
8 security cameras).  
9

### 10 **Outcomes**

11  
12 The psychometric tools used in this study will be analyzed to assess the  
13  
14 efficacy of the CPT. The primary outcome is the WHO-UCLA-AVLT delayed  
15  
16 recall score. The secondary outcome is the score of the TMT. The fall  
17  
18 incident will be analyzed to assess the safety of this Tai Chi program.  
19  
20 Complaints of medical symptoms related to the intervention will be  
21  
22 documented and treated when necessary, including fatigue, pain,  
23  
24 dizziness, and so on.  
25  
26  
27  
28  
29

### 30 **Sample size**

31  
32 The sample size was calculated by Power Analysis and Sample Size  
33  
34 Calculation Statistical Software V13.0 based on the results of  
35  
36 pre-experiment of this study. Using a type I error of 0.05 and a power of  
37  
38 80%, a mean difference of 2 points is expected between two groups after  
39  
40 10 months. The results show a sample size of 34 per groups is adequate  
41  
42 for testing the primary outcome (WHO-UCLA-AVLT delayed recall score).  
43  
44 Considering a 15% dropout rate, a total number of 80 participants will be  
45  
46 recruited.  
47  
48  
49  
50  
51

### 52 **Quality control and quality assurance**

53  
54 At least three dementia specialists will work together to examine the  
55  
56  
57

1  
2  
3 participants and provide diagnosis for each participant. All data will be  
4  
5 monitored and reviewed by the PI or research coordinators. Training will  
6  
7 be provided to all researchers. Consistency coefficients in scoring  
8  
9 assessment scales between researchers should be no less than 0.85.  
10  
11 Data entry will be verified by a second researcher in the team. To protect  
12  
13 participants' confidentiality, only supervisors, researchers of this study  
14  
15 and the ethics committee will be authorized to have access to the  
16  
17 personal information and medical records of the participants.  
18  
19  
20  
21

### 22 23 **Statistical method**

24  
25 All analyses will be carried out using SPSS version 16.0. The variations of  
26  
27 scores of psychometric assessments over time between two groups will  
28  
29 be examined using repeated measurement of variance analysis. The  
30  
31 association between intervention and incidence of falls will be analyzed  
32  
33 using Chi-Square test.  
34  
35  
36

### 37 38 **Ethics and dissemination**

39  
40 This study has been approved by the ethical review committee of the  
41  
42 Beijing Geriatric Hospital (protocol number: 2015-021). Information  
43  
44 leaflets of the study will be available at the three long-term care facilities.  
45  
46 The leaflets explain in full detail the aims and objectives of the study,  
47  
48 selection criteria and the processes that the study will be adhering to.  
49  
50 The research team will provide an individual face to face consultation to  
51  
52 all applicants or their guardian to answer any questions they may have.  
53  
54  
55  
56

1  
2  
3 The applicants can then discuss this with their family if they wish and  
4  
5 make a decision to opt in or opt out the study prior to signing the  
6  
7 consent form. Informed consent will be obtained from all participants or  
8  
9 their guardians. The authors intend to submit the findings of the study to  
10  
11 peer-reviewed journals or academic conferences to be published.  
12  
13  
14

### 15 **Patient and Public Involvement**

16  
17 The original research question and outcome measures were conceived  
18  
19 by the authors and were modified based on the face to face screening  
20  
21 interview with patients and their guardians by a research assistant. Five  
22  
23 patients with mild dementia were invited to learn and practice the CPT  
24  
25 program prior to designing the RCT. The CPT was modified based on the  
26  
27 comments and the feedback provided by the participants in order to  
28  
29 ensure the safety and the applicability of the intervention. Both the  
30  
31 burden and the potential benefit of the intervention will be assessed by  
32  
33 patients and their advisors before the consent forms are signed. The  
34  
35 findings of this study will be made available to the participants and their  
36  
37 guardians.  
38  
39  
40  
41  
42  
43

### 44 **CONCLUSION**

45  
46 This protocol outlined the objectives of the study and explained the CPT  
47  
48 exercise developed by the research team including geriatricians,  
49  
50 neurologists, rehabilitation specialists, experts of sports medicine, and  
51  
52 experienced practitioners of in traditional Chinese medicine. The study is  
53  
54  
55  
56  
57

1  
2  
3 designed as a randomized controlled trial in order to evaluate the effects  
4  
5 of this especially designed CPT on the participants with mild dementia.  
6  
7

### 8 **Contributors**

9  
10 Jihui Lyu conceived the idea and supervised this study and is the  
11  
12 guarantor. Jihui Lyu, Xiangjiang Rong, Xueli Chen, Fangling Li, Wenjie Li  
13  
14 and Lian Wei were involved in the design. Wenjie Li, Nayan Huang and  
15  
16 Xiangjiang Rong prepared draft manuscript. Jihui Lyu, Mei Champ, and  
17  
18 Qian Xiong revised the manuscript. Wenjie Li, Mo Li and Xiangjiang Rong  
19  
20 carried out the statistical calculation. All authors approved submission of  
21  
22 this manuscript.  
23  
24  
25  
26

### 27 **Acknowledgements**

28  
29 We thank Kai Hao (a staff of Publicity and Education Centre of BGH) for  
30  
31 helping us to improve the images of this article. We thank all the  
32  
33 participants and their advisors for their cooperation.  
34  
35  
36

### 37 **Funding**

38  
39 This work is supported by Beijing Clinical Characteristics Project of  
40  
41 Beijing Municipal Science and Technology Commission (Project number  
42  
43 Z151100004015023) and Major Clinical Medicine Development Plan of  
44  
45 Beijing Municipal Administration of Hospitals (Project number  
46  
47 ZYXL201834).  
48  
49  
50

### 51 **Competing interests**

52  
53  
54  
55 None declared.  
56

## REFERENCES

1. Bassil N, Mollaei C. Alzheimer's dementia: a brief review. *J Med Liban* 2012;60(4):192-9
2. Qaseem A, Snow V, Cross JT, Jr., et al. Current pharmacologic treatment of dementia: a clinical practice guideline from the American College of Physicians and the American Academy of Family Physicians. *Ann Intern Med* 2008;148:370-8
3. Schneider LS, Dagerman KS, Insel P. Risk of death with atypical antipsychotic drug treatment for dementia: meta-analysis of randomized placebo-controlled trials. *JAMA* 2005;294:1934-43
4. Schneider LS, Tariot PN, Dagerman KS, et al. Effectiveness of atypical antipsychotic drugs in patients with Alzheimer's disease. *N Engl J Med* 2006;355:1525-38
5. Schneider LS, Dagerman K, Insel PS. Efficacy and adverse effects of atypical antipsychotics for dementia: meta-analysis of randomized, placebo-controlled trials. *Am J Geriatr Psychiatry* 2006;14:191-210
6. Smith GS. Aging and neuroplasticity. *Dialogues Clin Neurosci* 2013;15(1):3-5
7. National Collaborating Centre for Mental Health. Dementia: a NICE–SCIE guideline on supporting people with dementia and their carers in health and social care. London: British Psychological Society,

- 1  
2  
3  
4 2007
- 5
- 6 8. Cheng ST, Chow PK, Yu EC, et al. Leisure activities alleviate depressive  
7  
8 symptoms in nursing home residents with very mild or mild dementia.  
9  
10  
11 *Am J Geriatr Psychiatry* 2012;20(10):904-8  
12
- 13 9. Knapp M, Thorgrimsen L, Patel A, Cognitive stimulation therapy for  
14  
15 people with dementia: cost-effectiveness analysis. *Br J Psychiatry*  
16  
17 2006;188:574-80  
18
- 19
- 20 10. Orrell M, Spector A, Thorgrimsen L, Woods B., et al. A pilot study  
21  
22 examining the effectiveness of maintenance Cognitive Stimulation  
23  
24 Therapy (MCST) for people with dementia. *Int J Geriatr Psychiatry*  
25  
26 2005;20(5):446-51  
27
- 28
- 29
- 30 11. Gillespie LD, Robertson MC, Gillespie WJ, et al. Interventions for  
31  
32 preventing falls in older people living in the community. *Cochrane*  
33  
34 *Database Syst Rev* 2012;(9):CD007146.  
35
- 36
- 37
- 38 12. Yuan S. The mechanisms of Tai Chi Traing. *Healthcare Science and*  
39  
40 *education* 2016;45:38  
41
- 42
- 43 13. American Geriatrics Society. Guideline for the prevention of falls in  
44  
45 older persons. *J Am Geriatr Soc* 2001;49:664–72  
46
- 47
- 48 14. Mortimer JA, Ding D, Borenstein AR, et al. Changes in brain volume  
49  
50 and cognition in a randomized trial of exercise and social interaction  
51  
52 in a community-based sample of non-demented Chinese elders. *J*  
53  
54 *Alzheimers Dis* 2012;30(4):757-66.  
55
- 56
- 57
- 58
- 59
- 60

- 1  
2  
3  
4 15.Yao L, Giordani B, Alexander NB. Developing a positive  
5  
6 emotion-motivated Tai Chi (PEM-TC) exercise program for older  
7  
8 adults with dementia. *Res Theory Nurs Pract* 2008;22(4):241-55  
9
- 10  
11 16.Klein PJ. Tai Chi Chuan in the management of Parkinson's disease and  
12  
13 Alzheimer's disease. *Med Sport Sci* 2008;52:173-81  
14
- 15  
16 17.Cheng ST, Chow PK, Song YQ, et al. Mental and Physical Activities  
17  
18 Delay Cognitive Decline in Older Persons with Dementia. *Am J Geriatr*  
19  
20 *Psychiatry* 2014;22(1):63-74  
21
- 22  
23 18.Tai SY, Hsu CL, Huang SW, et al. Effects of multiple training modalities  
24  
25 in patients with Alzheimer's disease: a pilot study. *Neuropsychiatr Dis*  
26  
27 *Treat* 2016; 12:2843-2849  
28
- 29  
30 19.Jia J, Wang F, Wei C, et al. The prevalence of dementia in urban and  
31  
32 rural areas of China. *Alzheimers Dement* 2014;10(1):1-9  
33
- 34  
35 20.Wang ZY, Zhang MY, Qu GY, et al. Application of Chinese version of  
36  
37 the Mini-Mental State Examination (MMSE). *Shanghai Arch*  
38  
39 *Psychiatry* 1989;7:108-111.  
40
- 41  
42 21.Jihui Lu, Dan Li, Fang Li, et al. Montreal Cognitive Assessment in  
43  
44 Detecting Cognitive Impairment in Chinese Elderly Individuals: A  
45  
46 Population-Based Study. *Journal of Geriatric Psychiatry and*  
47  
48 *Neurology* 2011; 24(4) 184-190  
49
- 50  
51  
52 22.Maj M, Satz P, Janssen R, et al. WHO Neuropsychiatric AIDS study,  
53  
54 cross-sectional phase II. Neuropsychological and neurological  
55  
56

- 1  
2  
3 findings. *Arch Gen Psychiatry* 1994;51(1):51-61.  
4  
5  
6 23.Zhao Q, Guo Q, Li F, et al. The Shape Trail Test: application of a new  
7  
8 variant of the Trail making test. *PLoS One* 2013;8(2):e57333.  
9  
10  
11 24.C. Lu QHG, Z Hong. Trail making test used by Chinese elderly patients  
12  
13 with mild cognitive impairment and mild Alzheimer dementia.  
14  
15 *Chinese Journal of Clinical Psychology* 2016;14: 118–121.  
16  
17  
18 25.Yesavage JA, Brink TL, Rose TL, et al. Development and validation of a  
19  
20 geriatric depression screening scale: a preliminary report. *J Psychiatr*  
21  
22 *Res* 1982-83;17(1):37-49  
23  
24  
25 26.Wang T, Xiao S, Li X, et al. Reliability and validity of the Chinese  
26  
27 version of the neuropsychiatric inventory in mainland China. *Int J*  
28  
29 *Geriatr Psychiatry* 2012;27(5):539-44  
30  
31  
32  
33 27.Mahoney FI, Barthel DW. Functional evaluation: the Barthel Index.  
34  
35 *Md State Med J* 1965;14:61-5.  
36  
37  
38  
39  
40  
41  
42  
43  
44  
45  
46  
47  
48  
49  
50  
51  
52  
53  
54  
55  
56  
57  
58  
59  
60



1  
2  
3  
4 **Figure legends:**  
5

6 **Figure 1 Trail Flow Chart.**  
7

8 **Figure 2 Main movements of the “Cognition Protecting Tai Chi” (CPT).**  
9

10 A1-3: Raising Both Hands  
11

12 B1-3: Forearm Rolling on Both Sides  
13

14 C1-3: Brush Knee and Twist Step on Both sides  
15

16 D1-3: Grasp the Bird's Tail-Left Side and then Right Side, Cloud Hands  
17

18 E1-3: Cloud Hands  
19

20 F1-3: Single Whip  
21

22 G1-3: Work at Shuttles on Both Sides  
23

24 H1-3: Raising Left and then Right Hand  
25  
26  
27  
28  
29  
30  
31  
32  
33  
34  
35  
36  
37  
38  
39  
40  
41  
42  
43  
44  
45  
46  
47  
48  
49  
50  
51  
52  
53  
54  
55  
56  
57  
58  
59  
60

1  
2  
3  
4  
5  
6  
7  
8  
9  
10  
11  
12  
13  
14  
15  
16  
17  
18  
19  
20  
21  
22  
23  
24  
25  
26  
27  
28  
29  
30  
31  
32  
33  
34  
35  
36  
37  
38  
39  
40  
41  
42  
43  
44  
45  
46  
47  
48  
49  
50  
51  
52  
53  
54  
55  
56  
57  
58  
59  
60

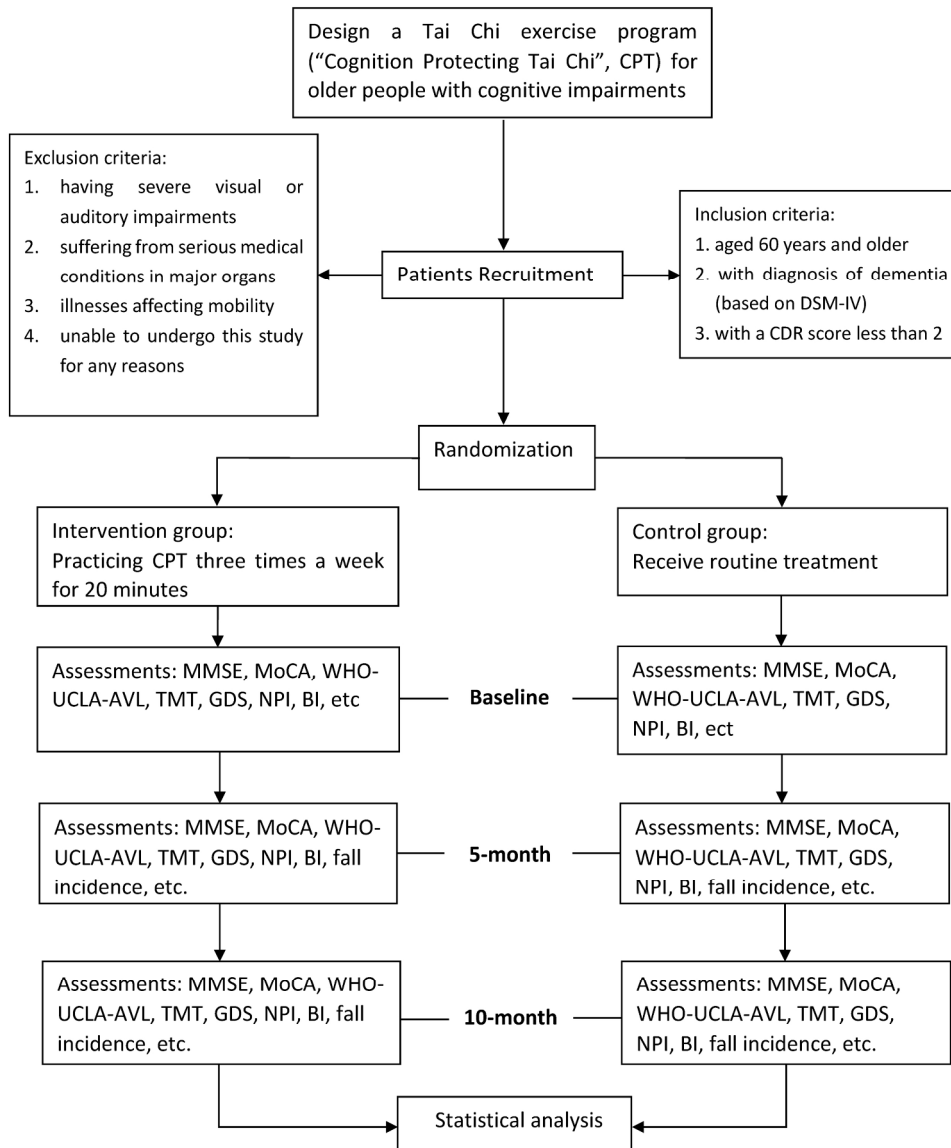

221x266mm (300 x 300 DPI)



Figure 2 Main movements of the "Cognition Protecting Tai Chi" (CPT).

A1-3: Raising Both Hands

B1-3: Forearm Rolling on Both Sides

C1-3: Brush Knee and Twist Step on Both sides

D1-3: Grasp the Bird's Tail-Left Side and then Right Side, Cloud Hands

E1-3: Cloud Hands

F1-3: Single Whip

G1-3: Work at Shuttles on Both Sides

H1-3: Raising Left and then Right Hand

292x223mm (300 x 300 DPI)



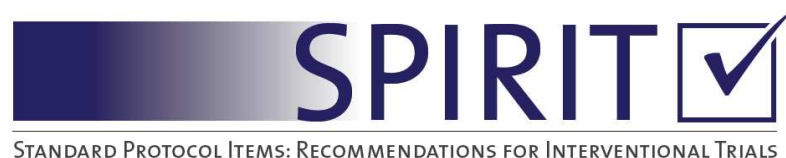

SPIRIT 2013 Checklist: Recommended items to address in a clinical trial protocol and related documents\*

| Section/item                      | Item No | Description                                                                                                                                                                                                                                                                              | Addressed on page number |
|-----------------------------------|---------|------------------------------------------------------------------------------------------------------------------------------------------------------------------------------------------------------------------------------------------------------------------------------------------|--------------------------|
| <b>Administrative information</b> |         |                                                                                                                                                                                                                                                                                          |                          |
| Title                             | 1       | Descriptive title identifying the study design, population, interventions, and, if applicable, trial acronym                                                                                                                                                                             | 1                        |
| Trial registration                | 2a      | Trial identifier and registry name. If not yet registered, name of intended registry                                                                                                                                                                                                     | 4                        |
|                                   | 2b      | All items from the World Health Organization Trial Registration Data Set                                                                                                                                                                                                                 | NA                       |
| Protocol version                  | 3       | Date and version identifier                                                                                                                                                                                                                                                              | NA                       |
| Funding                           | 4       | Sources and types of financial, material, and other support                                                                                                                                                                                                                              | 19                       |
| Roles and responsibilities        | 5a      | Names, affiliations, and roles of protocol contributors                                                                                                                                                                                                                                  | 19                       |
|                                   | 5b      | Name and contact information for the trial sponsor                                                                                                                                                                                                                                       | 1                        |
|                                   | 5c      | Role of study sponsor and funders, if any, in study design; collection, management, analysis, and interpretation of data; writing of the report; and the decision to submit the report for publication, including whether they will have ultimate authority over any of these activities | NA                       |
|                                   | 5d      | Composition, roles, and responsibilities of the coordinating centre, steering committee, endpoint adjudication committee, data management team, and other individuals or groups overseeing the trial, if applicable (see Item 21a for data monitoring committee)                         | NA                       |

**Introduction**

|    |                                                           |     |                                                                                                                                                                                                                                                                                                                                                                                |                            |
|----|-----------------------------------------------------------|-----|--------------------------------------------------------------------------------------------------------------------------------------------------------------------------------------------------------------------------------------------------------------------------------------------------------------------------------------------------------------------------------|----------------------------|
| 1  |                                                           |     |                                                                                                                                                                                                                                                                                                                                                                                |                            |
| 2  |                                                           |     |                                                                                                                                                                                                                                                                                                                                                                                |                            |
| 3  | Background                                                | 6a  | Description of research question and justification for undertaking the trial, including summary of relevant studies (published and unpublished) examining benefits and harms for each intervention                                                                                                                                                                             | 6-9                        |
| 4  | and rationale                                             |     |                                                                                                                                                                                                                                                                                                                                                                                |                            |
| 5  |                                                           |     |                                                                                                                                                                                                                                                                                                                                                                                |                            |
| 6  |                                                           | 6b  | Explanation for choice of comparators                                                                                                                                                                                                                                                                                                                                          | 9                          |
| 7  | Objectives                                                | 7   | Specific objectives or hypotheses                                                                                                                                                                                                                                                                                                                                              | 8, 9                       |
| 8  |                                                           |     |                                                                                                                                                                                                                                                                                                                                                                                |                            |
| 9  | Trial design                                              | 8   | Description of trial design including type of trial (eg, parallel group, crossover, factorial, single group), allocation ratio, and framework (eg, superiority, equivalence, noninferiority, exploratory)                                                                                                                                                                      | 9, 10, 11                  |
| 10 |                                                           |     |                                                                                                                                                                                                                                                                                                                                                                                |                            |
| 11 |                                                           |     |                                                                                                                                                                                                                                                                                                                                                                                |                            |
| 12 |                                                           |     |                                                                                                                                                                                                                                                                                                                                                                                |                            |
| 13 | <b>Methods: Participants, interventions, and outcomes</b> |     |                                                                                                                                                                                                                                                                                                                                                                                |                            |
| 14 |                                                           |     |                                                                                                                                                                                                                                                                                                                                                                                |                            |
| 15 | Study setting                                             | 9   | Description of study settings (eg, community clinic, academic hospital) and list of countries where data will be collected. Reference to where list of study sites can be obtained                                                                                                                                                                                             | 9                          |
| 16 |                                                           |     |                                                                                                                                                                                                                                                                                                                                                                                |                            |
| 17 |                                                           |     |                                                                                                                                                                                                                                                                                                                                                                                |                            |
| 18 | Eligibility criteria                                      | 10  | Inclusion and exclusion criteria for participants. If applicable, eligibility criteria for study centres and individuals who will perform the interventions (eg, surgeons, psychotherapists)                                                                                                                                                                                   | 11                         |
| 19 |                                                           |     |                                                                                                                                                                                                                                                                                                                                                                                |                            |
| 20 |                                                           |     |                                                                                                                                                                                                                                                                                                                                                                                |                            |
| 21 | Interventions                                             | 11a | Interventions for each group with sufficient detail to allow replication, including how and when they will be administered                                                                                                                                                                                                                                                     | 12, 13                     |
| 22 |                                                           |     |                                                                                                                                                                                                                                                                                                                                                                                |                            |
| 23 |                                                           |     |                                                                                                                                                                                                                                                                                                                                                                                |                            |
| 24 |                                                           | 11b | Criteria for discontinuing or modifying allocated interventions for a given trial participant (eg, drug dose change in response to harms, participant request, or improving/worsening disease)                                                                                                                                                                                 | 12, 13                     |
| 25 |                                                           |     |                                                                                                                                                                                                                                                                                                                                                                                |                            |
| 26 |                                                           |     |                                                                                                                                                                                                                                                                                                                                                                                |                            |
| 27 |                                                           | 11c | Strategies to improve adherence to intervention protocols, and any procedures for monitoring adherence (eg, drug tablet return, laboratory tests)                                                                                                                                                                                                                              | 12, 13                     |
| 28 |                                                           |     |                                                                                                                                                                                                                                                                                                                                                                                |                            |
| 29 |                                                           |     |                                                                                                                                                                                                                                                                                                                                                                                |                            |
| 30 |                                                           | 11d | Relevant concomitant care and interventions that are permitted or prohibited during the trial                                                                                                                                                                                                                                                                                  | 12                         |
| 31 |                                                           |     |                                                                                                                                                                                                                                                                                                                                                                                |                            |
| 32 | Outcomes                                                  | 12  | Primary, secondary, and other outcomes, including the specific measurement variable (eg, systolic blood pressure), analysis metric (eg, change from baseline, final value, time to event), method of aggregation (eg, median, proportion), and time point for each outcome. Explanation of the clinical relevance of chosen efficacy and harm outcomes is strongly recommended | 16                         |
| 33 |                                                           |     |                                                                                                                                                                                                                                                                                                                                                                                |                            |
| 34 |                                                           |     |                                                                                                                                                                                                                                                                                                                                                                                |                            |
| 35 |                                                           |     |                                                                                                                                                                                                                                                                                                                                                                                |                            |
| 36 |                                                           |     |                                                                                                                                                                                                                                                                                                                                                                                |                            |
| 37 | Participant                                               | 13  | Time schedule of enrolment, interventions (including any run-ins and washouts), assessments, and visits for participants. A schematic diagram is highly recommended (see Figure)                                                                                                                                                                                               | Figure 1. Trail flow chart |
| 38 | timeline                                                  |     |                                                                                                                                                                                                                                                                                                                                                                                |                            |
| 39 |                                                           |     |                                                                                                                                                                                                                                                                                                                                                                                |                            |
| 40 |                                                           |     |                                                                                                                                                                                                                                                                                                                                                                                |                            |
| 41 |                                                           |     |                                                                                                                                                                                                                                                                                                                                                                                |                            |
| 42 |                                                           |     |                                                                                                                                                                                                                                                                                                                                                                                |                            |
| 43 |                                                           |     |                                                                                                                                                                                                                                                                                                                                                                                |                            |
| 44 |                                                           |     |                                                                                                                                                                                                                                                                                                                                                                                |                            |
| 45 |                                                           |     |                                                                                                                                                                                                                                                                                                                                                                                |                            |
| 46 |                                                           |     |                                                                                                                                                                                                                                                                                                                                                                                |                            |
| 47 |                                                           |     |                                                                                                                                                                                                                                                                                                                                                                                |                            |

1

2

3 Sample size 14 Estimated number of participants needed to achieve study objectives and how it was determined, including 16

4 clinical and statistical assumptions supporting any sample size calculations

5

6 Recruitment 15 Strategies for achieving adequate participant enrolment to reach target sample size 11

7

8 **Methods: Assignment of interventions (for controlled trials)**

9

10 Allocation:

11

12 Sequence 16a Method of generating the allocation sequence (eg, computer-generated random numbers), and list of any 11, 12

13 generation factors for stratification. To reduce predictability of a random sequence, details of any planned restriction (eg,

14 blocking) should be provided in a separate document that is unavailable to those who enrol participants or

15 assign interventions

16

17 Allocation 16b Mechanism of implementing the allocation sequence (eg, central telephone; sequentially numbered, opaque, 12

18 concealment sealed envelopes), describing any steps to conceal the sequence until interventions are assigned

19 mechanism

20

21 Implementati 16c Who will generate the allocation sequence, who will enrol participants, and who will assign participants to 12

22 on interventions

23

24 Blinding 17a Who will be blinded after assignment to interventions (eg, trial participants, care providers, outcome 12

25 (masking) assessors, data analysts), and how

26

27 17b If blinded, circumstances under which unblinding is permissible, and procedure for revealing a participant's 12

28 allocated intervention during the trial

29

30

31 **Methods: Data collection, management, and analysis**

32

33 Data collection 18a Plans for assessment and collection of outcome, baseline, and other trial data, including any related 13-16

34 methods processes to promote data quality (eg, duplicate measurements, training of assessors) and a description of

35 study instruments (eg, questionnaires, laboratory tests) along with their reliability and validity, if known.

36 Reference to where data collection forms can be found, if not in the protocol

37

38 18b Plans to promote participant retention and complete follow-up, including list of any outcome data to be 12, 13

39 collected for participants who discontinue or deviate from intervention protocols

40

41

42

43

44

45

46

47

|    |                                 |     |                                                                                                                  |           |
|----|---------------------------------|-----|------------------------------------------------------------------------------------------------------------------|-----------|
| 1  |                                 |     |                                                                                                                  |           |
| 2  |                                 |     |                                                                                                                  |           |
| 3  | Data                            | 19  | Plans for data entry, coding, security, and storage, including any related processes to promote data quality     | 16, 17    |
| 4  | management                      |     | (eg, double data entry; range checks for data values). Reference to where details of data management             |           |
| 5  |                                 |     | procedures can be found, if not in the protocol                                                                  |           |
| 6  |                                 |     |                                                                                                                  |           |
| 7  | Statistical                     | 20a | Statistical methods for analysing primary and secondary outcomes. Reference to where other details of the        | 17        |
| 8  | methods                         |     | statistical analysis plan can be found, if not in the protocol                                                   |           |
| 9  |                                 |     |                                                                                                                  |           |
| 10 |                                 | 20b | Methods for any additional analyses (eg, subgroup and adjusted analyses)                                         | NA        |
| 11 |                                 |     |                                                                                                                  |           |
| 12 |                                 | 20c | Definition of analysis population relating to protocol non-adherence (eg, as randomised analysis), and any       | NA        |
| 13 |                                 |     | statistical methods to handle missing data (eg, multiple imputation)                                             |           |
| 14 |                                 |     |                                                                                                                  |           |
| 15 | <b>Methods: Monitoring</b>      |     |                                                                                                                  |           |
| 16 |                                 |     |                                                                                                                  |           |
| 17 | Data monitoring                 | 21a | Composition of data monitoring committee (DMC); summary of its role and reporting structure; statement of        | NA        |
| 18 |                                 |     | whether it is independent from the sponsor and competing interests; and reference to where further details       |           |
| 19 |                                 |     | about its charter can be found, if not in the protocol. Alternatively, an explanation of why a DMC is not needed |           |
| 20 |                                 |     |                                                                                                                  |           |
| 21 |                                 | 21b | Description of any interim analyses and stopping guidelines, including who will have access to these interim     | NA        |
| 22 |                                 |     | results and make the final decision to terminate the trial                                                       |           |
| 23 |                                 |     |                                                                                                                  |           |
| 24 | Harms                           | 22  | Plans for collecting, assessing, reporting, and managing solicited and spontaneously reported adverse events     | 17        |
| 25 |                                 |     | and other unintended effects of trial interventions or trial conduct                                             |           |
| 26 |                                 |     |                                                                                                                  |           |
| 27 | Auditing                        | 23  | Frequency and procedures for auditing trial conduct, if any, and whether the process will be independent from    | NA        |
| 28 |                                 |     | investigators and the sponsor                                                                                    |           |
| 29 |                                 |     |                                                                                                                  |           |
| 30 |                                 |     |                                                                                                                  |           |
| 31 | <b>Ethics and dissemination</b> |     |                                                                                                                  |           |
| 32 |                                 |     |                                                                                                                  |           |
| 33 | Research ethics                 | 24  | Plans for seeking research ethics committee/institutional review board (REC/IRB) approval                        | 4, 17, 18 |
| 34 | approval                        |     |                                                                                                                  |           |
| 35 |                                 |     |                                                                                                                  |           |
| 36 | Protocol                        | 25  | Plans for communicating important protocol modifications (eg, changes to eligibility criteria, outcomes,         | NA        |
| 37 | amendments                      |     | analyses) to relevant parties (eg, investigators, REC/IRBs, trial participants, trial registries, journals,      |           |
| 38 |                                 |     | regulators)                                                                                                      |           |
| 39 |                                 |     |                                                                                                                  |           |
| 40 |                                 |     |                                                                                                                  |           |
| 41 |                                 |     |                                                                                                                  |           |
| 42 |                                 |     |                                                                                                                  |           |
| 43 |                                 |     |                                                                                                                  |           |
| 44 |                                 |     |                                                                                                                  |           |
| 45 |                                 |     |                                                                                                                  |           |
| 46 |                                 |     |                                                                                                                  |           |
| 47 |                                 |     |                                                                                                                  |           |

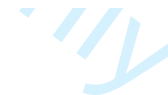

|    |                   |     |                                                                                                                   |           |
|----|-------------------|-----|-------------------------------------------------------------------------------------------------------------------|-----------|
| 1  |                   |     |                                                                                                                   |           |
| 2  |                   |     |                                                                                                                   |           |
| 3  | Consent or        | 26a | Who will obtain informed consent or assent from potential trial participants or authorised surrogates, and how    | 4, 17, 18 |
| 4  | assent            |     | (see Item 32)                                                                                                     |           |
| 5  |                   |     |                                                                                                                   |           |
| 6  |                   | 26b | Additional consent provisions for collection and use of participant data and biological specimens in ancillary    | NA        |
| 7  |                   |     | studies, if applicable                                                                                            |           |
| 8  |                   |     |                                                                                                                   |           |
| 9  | Confidentiality   | 27  | How personal information about potential and enrolled participants will be collected, shared, and maintained in   | 17, 18    |
| 10 |                   |     | order to protect confidentiality before, during, and after the trial                                              |           |
| 11 |                   |     |                                                                                                                   |           |
| 12 | Declaration of    | 28  | Financial and other competing interests for principal investigators for the overall trial and each study site     | 19        |
| 13 | interests         |     |                                                                                                                   |           |
| 14 |                   |     |                                                                                                                   |           |
| 15 | Access to data    | 29  | Statement of who will have access to the final trial dataset, and disclosure of contractual agreements that limit | NA        |
| 16 |                   |     | such access for investigators                                                                                     |           |
| 17 |                   |     |                                                                                                                   |           |
| 18 | Ancillary and     | 30  | Provisions, if any, for ancillary and post-trial care, and for compensation to those who suffer harm from trial   | NA        |
| 19 | post-trial care   |     | participation                                                                                                     |           |
| 20 |                   |     |                                                                                                                   |           |
| 21 | Dissemination     | 31a | Plans for investigators and sponsor to communicate trial results to participants, healthcare professionals, the   | 4, 17, 18 |
| 22 | policy            |     | public, and other relevant groups (eg, via publication, reporting in results databases, or other data sharing     |           |
| 23 |                   |     | arrangements), including any publication restrictions                                                             |           |
| 24 |                   |     |                                                                                                                   |           |
| 25 |                   | 31b | Authorship eligibility guidelines and any intended use of professional writers                                    | NA        |
| 26 |                   |     |                                                                                                                   |           |
| 27 |                   | 31c | Plans, if any, for granting public access to the full protocol, participant-level dataset, and statistical code   | NA        |
| 28 |                   |     |                                                                                                                   |           |
| 29 | <b>Appendices</b> |     |                                                                                                                   |           |
| 30 |                   |     |                                                                                                                   |           |
| 31 | Informed          | 32  | Model consent form and other related documentation given to participants and authorised surrogates                | NA        |
| 32 | consent           |     |                                                                                                                   |           |
| 33 | materials         |     |                                                                                                                   |           |
| 34 |                   |     |                                                                                                                   |           |
| 35 | Biological        | 33  | Plans for collection, laboratory evaluation, and storage of biological specimens for genetic or molecular         | NA        |
| 36 | specimens         |     | analysis in the current trial and for future use in ancillary studies, if applicable                              |           |
| 37 |                   |     |                                                                                                                   |           |
| 38 |                   |     |                                                                                                                   |           |
| 39 |                   |     |                                                                                                                   |           |
| 40 |                   |     |                                                                                                                   |           |
| 41 |                   |     |                                                                                                                   |           |
| 42 |                   |     |                                                                                                                   |           |
| 43 |                   |     |                                                                                                                   |           |
| 44 |                   |     |                                                                                                                   |           |
| 45 |                   |     |                                                                                                                   |           |
| 46 |                   |     |                                                                                                                   |           |
| 47 |                   |     |                                                                                                                   |           |



1  
2 \*It is strongly recommended that this checklist be read in conjunction with the SPIRIT 2013 Explanation & Elaboration for important clarification on the items.  
3 Amendments to the protocol should be tracked and dated. The SPIRIT checklist is copyrighted by the SPIRIT Group under the Creative Commons  
4 "[Attribution-NonCommercial-NoDerivs 3.0 Unported](#)" license.  
5  
6  
7  
8  
9  
10  
11  
12  
13  
14  
15  
16  
17  
18  
19  
20  
21  
22  
23  
24  
25  
26  
27  
28  
29  
30  
31  
32  
33  
34  
35  
36  
37  
38  
39  
40  
41  
42  
43  
44  
45  
46  
47

For peer review only
